1 **Title:** Properties of individual hippocampal synapses influencing NMDA-receptor activation by  
2 spontaneous neurotransmission.

3 **Abbreviated title:** NMDAR activation by spontaneous release

4  
5 Sarah R. Metzbower<sup>1</sup>, Yuyoung Joo<sup>2</sup>, David R. Benavides<sup>2</sup>, & Thomas A. Blanpied<sup>1</sup>

6 <sup>1</sup>Department of Physiology and Program in Neuroscience, University of Maryland School of  
7 Medicine, Baltimore, Maryland 21201, USA.

8 <sup>2</sup>Department of Neurology, University of Maryland School of Medicine, Baltimore, Maryland  
9 21201, USA.

10

11 SRM and TAB designed research; SRM performed research; YJ & DRB performed immunoblots  
12 and immunoblot analysis; SRM, DRB, and TAB wrote the paper.

13

14 Corresponding address: Thomas A. Blanpied, Department of Physiology, University of Maryland  
15 School of Medicine, 655 West Baltimore Street Baltimore, MD 21201

16 email: [tblanpied@som.umaryland.edu](mailto:tblanpied@som.umaryland.edu)

17

18 7 Figures

22 Abstract: 216 words

19 0 Tables

23 Significance statement: 132 words

20 0 Multimedia

24 Introduction: 873 words

21

25 Discussion: 2588 words

26

27 Acknowledgements: We thank Sai Sachin Divakaruni, Aaron Levy, and other members of the  
28 Blanpied Lab for helpful discussion, Minerva Contreras for invaluable technical assistance and  
29 the University of Maryland School of Medicine Center for Innovative Biomedical Resources  
30 Confocal Microscopy Facility.

31 Conflicts of interest: Author's report no conflict of interest.

32 Funding sources: This work was supported by F31-MH105105 and T32-GM008181 to S.R.M.,

33 R01-MH080046 and NS090644 to T.A.B.

34

35

36

37

38

39

40

41

42

43

44

45

46

47

48

49

50

51

52

53

54

55

56

57

58 **Abstract**

59 NMDA receptor (NMDAR) activation is critical for maintenance and modification of synapse  
60 strength. Specifically, NMDAR activation by spontaneous glutamate release has been shown to  
61 mediate forms of synaptic plasticity as well as synaptic development. Interestingly, there is  
62 evidence that within individual synapses each release mode may be segregated such that  
63 postsynaptically there are distinct pools of responsive receptors. In order to examine potential  
64 regulators of NMDAR activation due to spontaneous glutamate release in cultured rat  
65 hippocampal neurons, we utilized GCaMP6f imaging at single synapses in concert with confocal  
66 and super-resolution imaging. Using these single spine approaches, we found that  $\text{Ca}^{2+}$  entry  
67 activated by spontaneous release tends to be carried by GluN2B-NMDARs. Additionally, the  
68 amount of NMDAR activation varies greatly both between synapses and within synapses, and is  
69 unrelated to spine and synapse size, but does correlate loosely with synapse distance from the  
70 soma. Despite the critical role of spontaneous activation of NMDARs in maintaining synaptic  
71 function, their activation seems to be controlled factors other than synapse size or synapse  
72 distance from the soma. It is most likely that NMDAR activation by spontaneous release  
73 influenced variability in subsynaptic receptor position, release site position, vesicle content, and  
74 channel properties. Therefore, spontaneous activation of NMDARs appears to be regulated  
75 distinctly from other receptor types, notably AMPARs, within individual synapses.

76

77

78

79 **Significance Statement**

80 Understanding the underlying synaptic mechanisms for learning and memory is critically  
81 important to the field of neuroscience and for human health. A key neurotransmitter receptor  
82 type involved in learning is the NMDA receptor, and exploration of its regulation is vital. In this  
83 study, we optimized optical tools to allow detailed characterization of NMDA receptor activity at  
84 single synapses, along with analysis of structural features of the imaged synapses. The amount  
85 of receptor activation is independent of the size of the synapse, but weakly dependent on  
86 synapse position within the dendritic tree. Notably, we found that NMDA receptors activated  
87 following spontaneous neurotransmitter release tend to be GluN2B-containing receptors. Thus, the  
88 unique mechanisms that regulate the number and positioning of these receptors within  
89 synapses will have important consequences for control of synaptic development and signaling.

90

91 **Introduction**

92 NMDA-type glutamate receptor (NMDAR) activation is critical for learning and memory.  
93 This is due to the unique ability of NMDARs to allow influx of  $\text{Ca}^{2+}$  into dendritic spines following  
94 glutamate binding and sufficient membrane depolarization (MacDermott et al., 1986; Ascher and  
95 Nowak, 1988). It is well established that NMDAR activation by action potential (AP)-dependent  
96 neurotransmitter release initiates complex signaling within the postsynaptic density (PSD),  
97 which underlies many forms for synaptic plasticity and is essential for normal synaptic function  
98 (Kennedy, 2000; Hardingham et al., 2001; Hardingham and Bading, 2003; Higley and Sabatini,  
99 2012; Hugarir and Nicoll, 2013). However, NMDAR activation by spontaneous glutamate  
100 release, while less studied, also plays a central role in synaptic function. NMDAR-mEPSCs in  
101 hippocampus are quite small, ranging from 3 to 20 pA (Prybylowski and Wenthold, 2004; Watt  
102 et al., 2004; Prybylowski et al., 2005), and they show a high degree of variability in amplitude  
103 (Bekkers and Stevens, 1989). Nevertheless, blockade of NMDAR-mEPSCs induces local  
104 protein synthesis-dependent synaptic plasticity (Sutton et al., 2004; Frank et al., 2006; Sutton et  
105 al., 2007; Aoto et al., 2008), and NMDAR-mEPSCs mediate synaptic development at distal sites  
106 (Andreae and Burrone, 2015). It has been hypothesized that the amount of  $\text{Ca}^{2+}$  influx through  
107 NMDARs within a synapse may lead to different downstream effects (Cummings et al., 1996)  
108 and therefore is a critical factor in determining how individual synapses function. Thus,  
109 understanding how NMDAR activation due to spontaneous release events is regulated at  
110 individual synapses is essential for our understanding of how synapses are maintained and  
111 modulated.

112 Though spontaneous transmission clearly utilizes mechanisms that for the most part are  
113 in common with action potential-evoked transmission, some evidence has accrued to suggest  
114 that it involves unique elements both pre and postsynaptically. Application of open channel  
115 blockers during evoked release led to an elimination of responses due to evoked but not  
116 spontaneous release and vice versa for NMDARs, as well as AMPA receptors. This suggests

117 that receptors activated by spontaneous release may form a synaptic pool separate from  
118 receptors activated by evoked release within a single synapse (Atasoy et al., 2008; Sara et al.,  
119 2011). Additionally, there is some evidence that glutamate vesicles that fuse spontaneously are  
120 drawn from a specific subset of the total vesicle pool (Sara et al., 2005; Fredj and Burrone,  
121 2009; Ramirez and Kavalali, 2011; Andrae et al., 2012), though this is still a subject of some  
122 debate (Prange and Murphy, 1999; Groemer and Klingauf, 2007; Hua et al., 2010; Wilhelm et  
123 al., 2010). However, that spontaneous activation drives signaling pathways through NMDAR  
124 activation at individual synapses that are unique from those induced by evoked release (Sutton  
125 et al., 2007; Autry et al., 2011), supports the notion that a portion of synaptic NMDARs are  
126 specifically activated by spontaneously released glutamate. Taken together this highlights the  
127 need to understand the factors at individual synapses that control the type and numbers of  
128 NMDARs activated by spontaneous release.

129         One such parameter could be NMDAR subunit composition, which is a major factor that  
130 influences both receptor biophysical properties and downstream signaling pathways (Paoletti et  
131 al., 2013; Shipton and Paulsen, 2014b). NMDARs are typically assembled from two GluN1  
132 subunits and two GluN2 subunits that either are two GluN2A (GluN2A-NMDARs), two GluN2B  
133 (GluN2B-NMDARs), or triheteromers with one of each type of GluN2 subunit (GluN2A/B-  
134 NMDARs) (Rauner and Köhr, 2011; Tovar et al., 2013; Hansen et al., 2014). These receptor  
135 types have biophysical differences in glutamate affinity, channel open time, and decay kinetics  
136 that lead to differences in  $\text{Ca}^{2+}$  influx magnitude and kinetics (Santucci and Raghavachari,  
137 2008). In addition, they engage in different protein-protein interactions within the PSD to gate  
138 unique downstream signaling pathways (Paoletti et al., 2013; Shipton and Paulsen, 2014b).  
139 Thus, which NMDAR subunits contribute to NMDAR activation by spontaneous release may  
140 underlie differences in receptor activation and subsequent functional effects.

141         For AMPA receptors (AMPA receptors), there is a strong relationship between the amount of  
142 receptor activation and the size of the spine (Matsuzaki et al., 2001). This suggests that

143 synapse structure may be an additional critical factor in modulating NMDAR activation by  
144 spontaneous release. However, neither the number of NMDARs present (Kharazia et al., 1999;  
145 Takumi et al., 1999; Shinohara et al., 2008; Chen et al., 2015), nor the amount of NMDAR  
146 activation by glutamate uncaging (Sobczyk et al., 2005) or evoked release (Nimchinsky et al.,  
147 2004), was correlated with synapse size. Nevertheless, because NMDAR activation due to  
148 spontaneous release may diverge from the total synaptic NMDAR pool, we asked whether  
149 spontaneous NMDAR activation is sensitive to synaptic spine or synapse size.

150 Here we combined single-synapse  $\text{Ca}^{2+}$  imaging with confocal and super-resolution  
151 microscopy to explore the relationship between NMDAR activation due to spontaneous single  
152 vesicle exocytosis and morphological features of individual synapses. We find that NMDAR  
153 activation by spontaneous release is mediated primarily through GluN2B-NMDARs. The amount  
154 of  $\text{Ca}^{2+}$  influx was not correlated with spine or synapse size, and only weakly correlated with  
155 synapse position on the neuron. However, the magnitude of activation was highly variable at  
156 individual synapses. Thus, the high degree of variability of spontaneous NMDAR activation is  
157 most likely dominated by stochastic channel fluctuations and by nanoscale intrinsic properties of  
158 the synapse including receptor position, release site position, and the glutamate concentration  
159 profile following each release event.

160

161

## 162 **Materials and Methods**

### 163 *Cell culture and GCaMP6f expression*

164 Dissociated hippocampal cultures were prepared from E18 rats of both sex and plated on glass  
165 coverslips coated with poly-A-lysine. A subset of cells was infected with  
166 pAAV.CAG.GCaMP6f.WPRE.SV40 (Penn Vector Core) at DIV0 and plated along with  
167 uninfected cells so that on each coverslip there is a mix of infected and uninfected cells. This  
168 allowed us to vary the ratio of infected cells to uninfected cells plated based on the requirement

169 of the experiment. For most experiments 10-15K infected cells were plated with 40K uninfected  
170 cells to have a total density ~50K/well. For correlative  $\text{Ca}^{2+}$  imaging and super-resolution  
171 experiments we used 1K infected cells plated with 30K uninfected cells per well. Transfections  
172 were performed using lipofectamine transfection at DIV18 with either GCaMP6f or tdTomato,  
173 and constructs were allowed to express for three days, followed by imaging on DIV21. All  
174 animal procedures were performed in accordance with the [Author University] animal care  
175 committee's regulations.

176

### 177 *$\text{Ca}^{2+}$ imaging*

178  $\text{Ca}^{2+}$  imaging was performed on three very similar spinning disk confocal systems. The first was  
179 a CSU-22 confocal (Yokagawa) with a Zyla 4.2 sCMOS camera (Andor) mounted on the side  
180 port of an Olympus IX-81 inverted microscope, using a 60x/1.42 oil-immersion objective. The  
181 second system utilized the same camera, microscope, and objective as above but the CSU-22  
182 confocal was replaced with a Dragonfly multimodal system (Andor). All time-lapses were  
183 acquired at 20 Hz controlled by IQ3 (Andor). Following time-lapse acquisition, a z-stack of the  
184 field was acquired using 50-200 ms frames and 0.5  $\mu\text{m}$  steps between planes. Coverslips were  
185 imaged in ACSF containing 0 mM  $\text{Mg}^{2+}$ , 139 mM NaCl, 2.5 mM KCl, 1.5 mM  $\text{CaCl}_2$ , 10 mM  
186 glucose, and 10 mM HEPES, pH adjusted to 7.4 with NaOH, 1  $\mu\text{M}$  TTX (Enzo), 10  $\mu\text{M}$  DNQX  
187 (Sigma), 20  $\mu\text{M}$  ryanodine (Tocris), 1  $\mu\text{M}$  thapsigargin (Sigma) and 5  $\mu\text{M}$  nifedipine (Sigma). All  
188 experiments were performed using an objective heater to maintain bath temperature near 37°C.  
189 In order to maintain the plane of focus, autofocus was performed every minute using an  
190 Olympus ZDC2. For experiments with a treatment (adding blockers, ifenprodil, raising  $\text{Ca}^{2+}$ , and  
191 raising  $\text{Mg}^{2+}$ ), baseline imaging of 4-6 minutes was followed by application of either drugs or  
192 vehicle (ACSF or DMSO, depending on drug) and then by an additional 4-6 minutes of imaging.  
193 The third spinning disk confocal system was a Nikon W1 equipped with a 40x/1.3 oil immersion  
194 objective and Hamamatsu Flash4.2 camera, mounted on a Ti2 microscope. This was used for



195 imaging the larger dendritic trees in Figure 5, and images were acquired using otherwise the  
196 same parameters and conditions as above. For experiments in Extended Data Figure 2.1,  
197 experiments using transfected cells, as well as D-serine experiments were performed on a Nikon  
198 TI2 equipped for widefield fluorescence imaging using a 40x/1.3 oil immersion objective and a  
199 Zyla 4.2 sCMOS camera. Autofocus was maintained continuously, and acquisition parameters  
200 were otherwise the same as above.

201

### 202 *Ca<sup>2+</sup> Imaging Analysis*

203 In order to analyze the Ca<sup>2+</sup> imaging data, averages of the first 50-100 frames were generated  
204 either in Matlab or MetaMorph. On each averaged image, a circular region of interest (ROI) was  
205 drawn around every single spine that was in focus, distinct from the dendrite, and unobstructed,  
206 regardless of activity level, as well as a background ROI. Mean intensity within each region was  
207 measured for every frame using custom Matlab scripts. Background subtraction was done by  
208 subtracting the average intensity of the background ROI from the average intensity of each  
209 spine ROI per frame. In order to calculate  $\Delta F/F$ ,  $F_{\text{baseline}}$  was determined for each spine ROI  
210 every minute by averaging fluorescence intensity every 10 frames, and within every minute  
211 interval of imaging finding the lowest positive value. Then for each frame  $(F_{\text{frame}} - F_{\text{baseline}})/$   
212  $F_{\text{baseline}}$  was calculated. In order to detect and measure peaks, the  $\Delta F/F$  values were then fed  
213 into Clampex (Axon Instruments) where mSCaTs were detected using a template search that  
214 identified peaks based on an average shape profile. For measurements normalized to baseline,  
215 only spines that had at least three mSCaTs at baseline were included, typically ~23-55% of all  
216 spines imaged. While for measurements that are not normalized, all spines are included for  
217 frequency data and spines with at least one mSCaT were used for amplitude data.

218

### 219 *Spine and cell morphological analysis*

220 Spine area was measured using maximum projections of the post-Ca<sup>2+</sup> imaging  
221 GCaMP6f z-stacks in MetaMorph. Within each spine ROI, an intensity-based threshold was  
222 used to calculate area. In order to measure synapse distance from the soma and branch depth,  
223 GCaMP6f z-stacks were imported into Imaris (Bitplane) for semi-automatic dendrite and spine  
224 detection. Spines identified in Imaris were matched to Ca<sup>2+</sup> imaged spines using custom Matlab  
225 scripts.

226

### 227 *Immunocytochemistry*

228 For immunocytochemistry, cultured hippocampal neurons were fixed in 4% paraformaldehyde  
229 (PFA) and 4% sucrose directly following Ca<sup>2+</sup> imaging for 20 minutes at room temperature (RT).  
230 Following fixation, coverslips were washed with Phosphate buffered saline (PBS) + Glycine and  
231 permeabilized in PBS+ 0.3% Triton X-100 for 20 minutes at RT. Next, cells were incubated in  
232 blocking buffer containing 10% Donkey Serum (DS) (Sigma) and 0.2% Triton X-100 for 1 hour  
233 at room temperature. For labeling of Shank, cells were incubated in 1:200 anti-Shank primary  
234 (NeuroMab; RRID:10672418), 5% DS and 0.1% Triton X-100 for 3 hours at RT. Followed by  
235 incubation with 1:200 Alexa-647 conjugated goat anti-mouse secondary antibody (Jackson) for  
236 1 hour at RT. Finally, cells were post-fixed in 4% PFA and 4% sucrose for 10 minutes.

237

### 238 *Super-resolution imaging*

239 dSTORM imaging was performed on the Olympus IX-81 inverted microscope, using a 60x/1.42  
240 oil-immersion objective along with Dragonfly multimodal system (Andor) and an iXon+ 897 EM-  
241 CCD camera (Andor). Cells that had undergone Ca<sup>2+</sup> imaging were first located by eye in PBS,  
242 which was then replaced with STORM imaging buffer containing 50 mM Tris, 10mM NaCl, 10%  
243 glucose, 0.5 mg/ml glucose oxidase (Sigma), 40 µg/ml catalase (Sigma), and 0.1 M cysteamine  
244 (Sigma) before imaging. Acquisition was performed at 20 Hz, for a total of 70,000 frames while  
245 autofocusing every 1000 frames. Imaging was carried out in widefield mode using a power

246 density of 4 was used to concentrate the excitation beam. This allowed for more efficient  
247 bleaching of the Alexa-647 molecules.

248

#### 249 *Super-resolution imaging analysis*

250 All dSTORM analysis was done using custom Matlab (Mathworks) scripts that fit peaks with an  
251 elliptical 2D Gaussian function to a 5 by 5 pixel array. The fitted peaks were used to determine x  
252 and y coordinates of the molecules. Molecules with a localization precision less than 20 were  
253 used for analysis. PSD detection was performed using custom Matlab scripts. Briefly, following  
254 localization detection and drift correction, the image was re-rendered with 14.75 nm pixels, and  
255 clusters of localizations exceeding the density cutoff of 1 localization per 217.6 nm<sup>2</sup> were  
256 identified. Clusters with areas less than 0.02 μm<sup>2</sup>, the bottom of the range reported for synapses  
257 imaged with super-resolution (MacGillavry et al., 2013), were rejected. Spine Ca<sup>2+</sup> data was  
258 matched to individual PSDs by overlaying super resolved PSDs on the GCaMP6f z-stack and  
259 manually matching spines between the post-STORM z-stack and the Ca<sup>2+</sup> imaging time-lapse.

260

#### 261 *Immunoblotting.*

262 Hippocampal neuron cultures were prepared as described, infected on DIV0 with AAV vectors,  
263 and plated at density of ~100,000 cells per well in 12-well plate. Neurons were matured as  
264 described and on DIV12 or DIV19, neuronal cell homogenates were prepared in preheated  
265 buffer containing 1% SDS, 50 mM NaF, 1 mM sodium orthovanadate, and Phosphatase  
266 Inhibitor Cocktail I (Sigma) and Phosphatase Inhibitor Cocktail III (Sigma) supplemented with  
267 protease inhibitors (Roche cOmplete, EDTA-free). Homogenates were collected into  
268 microcentrifuge tubes, sonicated using manual ultrasonication probe, and heated at 65C for 10  
269 min. Protein concentration was determined by BCA assay (Pierce) and equal amounts of total  
270 protein (10 micrograms) from each sample were resolved by SDS-PAGE and transferred to  
271 PVDF membranes for detection by near-infrared fluorescence. Total protein stain was

272 performed on all membranes (REVERT, LI-COR Biosciences). Immunoblot images were  
273 obtained on Odyssey Imaging System and quantitated using Image Studio 4.0 software (LI-  
274 COR Biosciences). NMDAR subunit protein levels were normalized against total protein signal  
275 for each lane. Quantitative plots were constructed using normalized mean values from 6  
276 samples collected from each condition on each maturation day from a single culture. Data  
277 represent mean values +/- standard error of the mean (SEM). Statistical analyses were  
278 conducted on quantitated values using GraphPad software.

279

### 280 *Antibodies.*

281 Membranes were blotted with primary antibodies including rabbit polyclonal anti-GluN1 C-  
282 terminus (1:2000, Sigma-Aldrich Cat# G8913, RRID:AB\_259978), rabbit polyclonal anti-GluN2A  
283 N-terminus (1:500, JH6097 gift from R. Huganir), mouse monoclonal anti-GluN2B C-terminus  
284 (1:2000, Millipore Cat# 05-920, RRID:AB\_417391), and mouse monoclonal anti- $\alpha$  Tubulin  
285 (1:2000, Sigma-Aldrich Cat# T6074, RRID:AB\_477582). Near-infrared conjugated secondary  
286 antibodies were used to detect signal for GluN1 or GluN2A: Donkey anti-Rabbit 680RD  
287 (1:10,000, LI-COR Biosciences Cat# 926-68073, RRID:AB\_10954442), GluN2B: Donkey anti-  
288 Mouse 800CW (1:10,000, LI-COR Biosciences Cat# 926-32212, RRID:AB\_621847), and  $\alpha$ -  
289 Tubulin: Goat anti-Mouse 680RD (1:10,000 LI-COR Biosciences Cat# 926-68070,  
290 RRID:AB\_10956588).

291

### 292 *Experimental Design and Statistical Analysis*

293 Unless otherwise stated, the number of spines was greater than 200; however, treatment with  
294 ifenprodil or  $Mg^{2+}$  reduced event frequency so that there were fewer spines to use for mSCaT  
295 amplitude measurements post-treatment and unless otherwise stated these came from at least  
296 3 separate culture preparations. Statistical analysis was performed using GraphPad Prism. Data  
297 are shown as mean  $\pm$  SEM. Krusal-Wallis followed by Dunn's test for multiple comparisons were

298 used for experiments that had more than two groups, otherwise Student's t-test was used to  
299 compare means at  $p < 0.05$ . For experiments comparing the effect of a treatment between  
300 groups, post-treatment parameters were normalized to each spine's own baseline in order to  
301 assess the impact of the treatment. For correlations, Pearson's correlation coefficients were  
302 used to assess the strength of the relationship. When noted, data was binned into 8 bins so that  
303 pattern in the data could be observed more clearly, however no statistics were performed on  
304 binned data. Additionally, for data represented by violin plots, outliers were removed using the  
305 ROUT method of identifying outliers. However, all statistics were performed on the raw data  
306 before outlier removal.

307

## 308 **Results**

### 309 Measuring NMDAR-mediated $\text{Ca}^{2+}$ transients with GCaMP6f at individual synapses.

310 To assess NMDAR-activation by spontaneous neurotransmitter release, we sparsely  
311 infected dissociated rat hippocampal neurons at the time of plating and imaged neurons at 19-  
312 22 DIV (unless otherwise noted) in ACSF containing 0 mM  $\text{Mg}^{2+}$ , and TTX (1  $\mu\text{M}$ ) to block APs.  
313 Clear miniature spontaneous  $\text{Ca}^{2+}$  transients (mSCaTs) were detected in individual spines (Fig.  
314 1A) that were well isolated within spines and did not correspond to increases in  $\text{Ca}^{2+}$  in  
315 dendrites (Fig. 1B). Though  $\text{Ca}^{2+}$  influx through NMDARs can lead to  $\text{Ca}^{2+}$  release from  
316 intracellular stores (Reese and Kavalali, 2015), we found that mSCaT amplitude in spines were  
317 unaffected by ryanodine and thapsigargin to prevent  $\text{Ca}^{2+}$ -induced  $\text{Ca}^{2+}$  release (CICR) from  
318 internal stores (vehicle:  $0.8164 \pm 0.032 \Delta\text{F}/\text{F}$ ,  $n=277$  spines/7 neurons; blockers:  $0.9206 \pm 0.055$   
319  $\Delta\text{F}/\text{F}$ , mean  $\pm$  SEM,  $n=239/6$ ;  $p= 0.095$ , unpaired t-test) (Fig. 1E, F). Despite this, in order to  
320 ensure isolation of the NMDAR component of spine  $\text{Ca}^{2+}$  changes, all experiments were done in  
321 the presence of DNQX to block AMPARs, nifedipine to block L-type  $\text{Ca}^{2+}$  channels, and  
322 previously mentioned CICR blockers. Application of the NMDAR antagonist APV nearly  
323 eliminated all events (post-treatment event frequency normalized to baseline: vehicle:  $0.9369 \pm$

324 0.03228, n=495/10, APV:  $0.05541 \pm 0.008763$ , n=197/5;  $p < 0.0001$ , unpaired t-test) (Fig. 1G, H),  
325 confirming that the observed  $\text{Ca}^{2+}$  transients were NMDAR-mediated.

326 In order to confirm that our measurement is sensitive to changes in NMDAR activation,  
327 we tested the dynamic range of GCaMP6f imaging at individual synapses. We reasoned that if  
328 the indicator is not near saturation then increases in extracellular  $\text{Ca}^{2+}$  will produce  
329 approximately proportional increases in fluorescence intensity (F), otherwise very large  $\text{Ca}^{2+}$   
330 influx will saturate the indicator and result in a disproportionately low  $\Delta F/F$ . To test this, we  
331 raised the concentration of  $\text{Ca}^{2+}$  in the ACSF from 1.5 mM to 1.88 mM and measured mSCaT  
332 amplitude. We observed a significant increase in the average mSCaT amplitude (vehicle:  $1.138$   
333  $\pm 0.031 \Delta F/F$ , n=611/17; 1.88 mM  $\text{Ca}^{2+}$ :  $1.56 \pm 0.051 \Delta F/F$ , n=377/4;  $p < 0.0001$ , Kruskal-Wallis)  
334 (Fig. 1I; Extended Data Figure 1-1), confirming that under our experimental conditions there was  
335 sufficient upper range to detect larger mSCaTs. To probe for sensitivity to smaller responses,  
336 and establish a lower limit to our detection, we added extracellular  $\text{Mg}^{2+}$  to block NMDAR  
337 channels, which we predicted would decrease the amplitude of mSCaTs. The  $\text{IC}_{50}$  of  $\text{Mg}^{2+}$  at a  
338 typical resting potential of -60 mV is  $\sim 20 \mu\text{M}$  for NMDARs (Kuner and Schoepfer, 1996).  
339 Increasing the extracellular  $\text{Mg}^{2+}$  concentration from 0 to 30  $\mu\text{M}$  caused a significant decrease of  
340 close to 50% in the range of mSCaT amplitudes, as expected (vehicle:  $1.138 \pm 0.031 \Delta F/F$ ,  
341 n=611/17; 30 $\mu\text{M}$ :  $0.697 \pm 0.046 \Delta F/F$ , n=122/7;  $p < 0.0001$ , Kruskal-Wallis) (Fig. 1I; Extended  
342 Data Figure 1-1), confirming that there is sufficient range to detect smaller mSCaTs.  
343 Additionally, the sensitivity of the events to  $[\text{Mg}^{2+}]$  further confirms that mSCaTs reflect the  
344 amount of NMDAR activation. In order to evaluate the lower limit of mSCaT detection, we raised  
345 the  $\text{Mg}^{2+}$  concentration again, to 100  $\mu\text{M}$  and 1 mM. Both concentrations decreased mSCaT  
346 amplitude (100  $\mu\text{M}$ :  $0.513 \pm 0.049 \Delta F/F$ , n=66/5; 1 mM:  $0.31 \pm 0.057 \Delta F/F$ , n=20/4;  $p < 0.0001$ ,  
347 Kruskal-Wallis (Fig. 1I; Extended Data Figure 1-1) and decreased mSCaT frequency (Hz)  
348 (vehicle:  $0.04 \pm 0.002$ , n=414/3; 100  $\mu\text{M}$ :  $0.005 \pm 0.0001$ , n=132/5; 1 mM:  $0.0004 \pm 0.0002$ ,  
349 n=89/4;  $p < 0.0001$ , Kruskal-Wallis). Interestingly, while the above  $\text{Mg}^{2+}$  experiments were

350 performed in the absence of DNQX, we observed the same effects of  $Mg^{2+}$  in the presence of  
351 DNQX (data not shown). Together this suggests that under more physiological conditions,  
352 AMPAR activation after spontaneous release does not alone cause sufficient depolarization to  
353 relieve the  $Mg^{2+}$  block on the NMDARs. This decrease in mSCaT frequency suggests that either  
354 a subset of events are too small to detect when  $Mg^{2+}$  is present, or that some synaptic NMDARs  
355 are effectively entirely blocked by  $Mg^{2+}$  at these concentrations. Measuring the distribution of  
356 individual mSCaTs in elevated  $Mg^{2+}$  revealed a lower  $\Delta F/F$  limit of 0.1  $\Delta F/F$ , the amplitude of the  
357 smallest events observed, below which mSCaTs cannot be reliably detected. While we cannot  
358 deduce the true amount of  $Ca^{2+}$  influx from the GCaMP6f  $\Delta F/F$  due to the nonlinearities inherent  
359 in the imaging approach, these data taken together indicate a large dynamic range of the  
360 reporter, and suggest it provides an acceptable readout of the strength of NMDAR activation at  
361 individual synapses. In order to ensure that NMDARs were minimally blocked, all other  
362 experiments were performed in the absence of added  $Mg^{2+}$ .

363 We observed that mSCaT amplitudes and frequencies were highly variable between  
364 synapses (Fig. 1C, D) with population inter-spine CVs of 0.64 and 0.99 respectively.  
365 Interestingly, the mean within-spine CV for event amplitude was also quite high, nearly at the  
366 level as what was observed between spines ( $0.57 \pm 0.01$   $n=700/10$ , at least 3 events per spine).  
367 This variability was not due to differences in co-agonist availability, as treatment with 100  $\mu M$  D-  
368 serine actually increased intra-spine mSCaT variability (mean CV normalized to baseline:  
369 vehicle:  $1.05 \pm 0.05$ ,  $n=159/4$ ; D-serine:  $1.28 \pm 0.05$ ,  $n=252/4$ ;  $p=0.002$ , unpaired t-test). We  
370 therefore asked what synaptic or receptor properties could underlie this high degree of  
371 variability in receptor activation by spontaneous release both within and between synapses.

372

373 GluN2B-NMDARs mediate the majority of the NMDAR-dependent  $Ca^{2+}$  influx by spontaneous  
374 release.

375 A critical regulator of NMDAR function and downstream signaling is the composition of  
376 its GluN2 subunit. Specifically, GluN2B-NMDARs are important mediators of synaptic plasticity  
377 (Foster et al., 2010; Sanhueza et al., 2011; Shipton and Paulsen, 2014a), which makes them  
378 well suited to mediate the plasticity induced by changes in spontaneous NMDAR activation.  
379 Therefore, we asked what proportion of mSCaTs in mature synapses is comprised of GluN2B-  
380 NMDARs activation. To address this, we imaged GCAMP6f before and after bath application of  
381 the GluN2B-specific antagonist ifenprodil (6  $\mu$ M), or vehicle (Fig. 2A, B). Ifenprodil at this  
382 concentration is expected to nearly completely block GluN2B-NMDARs, block ~20% of  
383 GluN2A/B-NMDARs, and have almost no effect on GluN2A-NMDARs (Stroebe et al., 2014). In  
384 our cells, treatment with ifenprodil caused a ~35% reduction in mSCaT amplitude (normalized  
385 amplitude: vehicle:  $0.977 \pm 0.015$ ,  $n=1204/20$ ; ifenprodil:  $0.622 \pm 0.017$ ,  $n=572/10$ ;  $p<0.0001$ ,  
386 Kruskal-Wallis) (Fig. 2C, D, G). Interestingly, we observed a dramatic reduction in mSCaT  
387 frequency following application of ifenprodil, with ~50% of synapses completely silenced by  
388 ifenprodil application and an ~81% reduction in overall mSCaT frequency (normalized  
389 frequency: vehicle:  $0.82 \pm 0.022$ ,  $n=961/20$ ; ifenprodil (3 wk):  $0.138 \pm 0.006$ ,  $n=788/10$ ;  
390  $p<0.0001$ , Kruskal-Wallis) (Fig. 2E, F, H). The dramatic drop in event frequency along with  
391 complete blockade of events at half of the synapses suggests a significant portion of mSCaTs  
392 are entirely GluN2B-NMDAR mediated, and that GluN2A-NMDARs contribute very little to  
393 NMDAR-mediated  $Ca^{2+}$  influx in response to spontaneous release.

394 Additionally, because GluN2B-NMDAR levels are developmentally regulated in some  
395 brain areas (Chen et al., 2000; Barth and Malenka, 2001; Ritter et al., 2002; Yashiro and  
396 Philpot, 2008), we imaged neurons at 5 weeks, to assess whether the large effect of ifenprodil  
397 on mSCaT frequency was due to the age of the cells. We found a significant reduction in  
398 amplitude and frequency with ifenprodil in 5-week cells (normalized amplitude (5 wk):  $0.608 \pm$   
399  $0.049$ ,  $n=94/9$ ; normalized frequency (5 wk):  $0.196 \pm 0.022$ ,  $n=130/9$ ;  $p<0.0001$ , Kruskal-Wallis),  
400 and no difference between the effects of ifenprodil on 3 week or 5 week old neurons (amplitude:



401  $p=0.546$ , Kruskal-Wallis; frequency:  $p=0.0247$ , Kruskal-Wallis) (Fig. 2C, D, E, F), indicating that  
402 GluN2B-NMDARs contribute significantly to spontaneous events in mature cultured  
403 hippocampal neurons of different ages. It is conceivable that expression of GCaMP6f, by  
404 chronic alteration of  $Ca^{2+}$  buffering in the cell, could lead to abnormal expression of GluN2  
405 subunits and prevent the typical developmental shift in the ratio of GluN2B:GluN2A subunits  
406 (Yashiro and Philpot, 2008). To test this, we examined subunit expression levels at DIV 12 and  
407 19 in control cultures, or in cultures that had been infected with GCaMP6f or GFP. In uninfected  
408 cultures, we observed the expected decrease in the ratio, and this decrease was unaltered in  
409 either virus-infected condition (Extended Data Figure 2-1C, D & Extended Data Figure 2-2). We  
410 then examined ifenprodil sensitivity in neurons that were only transiently transfected with  
411 GCaMP6f, rather than infected. We found that neurons that expressed GCaMP6f from DIV 18-  
412 21 showed the same high ifenprodil sensitivity as those chronically expressing via virus infection  
413 (Normalized amplitude: Veh-infected:  $0.98 \pm 0.016$ ,  $n=1204/20$ ; Ifen-Infected:  $0.622 \pm 0.017$ ,  
414  $n=572/10$ ; Veh-transfected:  $1.07 \pm 0.035$ ,  $n=103/4$ ; Ifen-transfected:  $0.633 \pm 0.051$ ,  $n=81/4$ ;  
415  $p<0.0001$ , one-way ANOVA; Normalized frequency: Veh-infected:  $0.82 \pm 0.022$ ,  $n=961/20$ ; Ifen-  
416 Infected:  $0.137 \pm 0.006$ ,  $n=788/10$ ; Veh-transfected:  $0.855 \pm 0.063$ ,  $n=110/4$ ; Ifen-transfected:  
417  $0.20 \pm 0.048$ ,  $n=142/4$ ;  $p<0.0001$ , one-way ANOVA) (Extended Data Figure 2-1A,B). These  
418 observations suggest that chronic GCaMP6f expression does not alter subunit expression.

419 Returning to further analysis of virally infected neurons, we also observed that synapses  
420 with larger mSCaTs at baseline were associated with a greater effect of ifenprodil on mSCaT  
421 amplitude ( $R^2=0.089$ ,  $p<0.0001$ ,  $n=544/10$ ) (Fig. 2I), and spines with higher mSCaT frequency  
422 at baseline tended to have a larger portion of events blocked with ifenprodil ( $R^2=0.012$ ,  
423  $p=0.003$ ,  $n=751/10$ ) (Fig. 2J). Thus, more active synapses, with more NMDAR activation, have  
424 a larger contribution of GluN2B-containing NMDARs to their events. Because GluN2B-NMDARs  
425 have longer open times and lower open probability than GluN2A-NMDARs, it is likely that there  
426 is increased variability in  $Ca^{2+}$  influx through GluN2B-NMDARs (Santucci and Raghavachari,

2008). Indeed, we observed that mSCaT amplitude variance was slightly reduced following ifenprodil treatment (baseline CV:  $0.633 \pm 0.02$ ; post-ifenprodil CV:  $0.495 \pm 0.016$ ;  $n=225$ ,  $p<0.0001$ , paired t-test, Fig. 2K), however this could at least be partially due to the large reduction in the number of events. Overall, NMDAR subtype may contribute to the high degree of variability in NMDAR-mediated  $\text{Ca}^{2+}$  influx. Taken together, these results not only indicate that GluN2B-NMDARs contribute to events at these synapses, but also that a significant portion of mSCaTs are largely GluN2B-NMDAR mediated.

434

#### NMDAR activation is independent of spine and synapse size.

While GluN2B-NMDARs contribute to variability of mSCaT amplitude within synapses, other parameters may mediate variability between synapses. While there is evidence that the number of NMDARs present in the PSD (Kharazia et al., 1999; Takumi et al., 1999; Shinohara et al., 2008; Chen et al., 2015) as well as the magnitude of their activation by evoked release is not related to spine size (Nimchinsky et al., 2004), there is a strong relationship between spine size and the amount of activation of other receptor types, particularly AMPARs (El-Husseini et al., 2000; Masanori Matsuzaki et al., 2004; Araki et al., 2015). Since NMDAR activation by spontaneous release may be regulated distinctly from NMDAR activation by evoked release, we tested the relationship between mSCaTs and spine size. We measured spine area at individual synapses based on post- $\text{Ca}^{2+}$  imaging z-stacks (Fig. 3A, B). Spine area ranged from  $0.163 \mu\text{m}^2$  to  $1.411 \mu\text{m}^2$  with a mean spine area of  $0.639 \pm 0.009 \mu\text{m}^2$ . By matching spine area to mSCaT data for each synapse, we found that mean mSCaT amplitude per spine was weakly negatively correlated with spine area for spontaneous release events ( $R^2=0.008$ ,  $p=0.028$ ,  $n=628/10$ ). A similar result was seen with binned spine area data to reduce overpowering the analysis ( $R^2=0.256$ ,  $p=0.023$ ,  $n=20/10$  (Fig. 3C). However, this negative correlation is likely due to smaller proportional  $\text{Ca}^{2+}$  influx in larger spines rather than differences in the amount of NMDAR

452 activation (Nimchinsky et al., 2004). Overall, this suggests that NMDAR activation does not  
453 substantially scale with spine size.

454 GluN2B-NMDARs have been shown to exit synapses that have undergone LTP (Dupuis et  
455 al., 2014) and those synapses tend to be larger (Matsuzaki et al., 2001; Malenka and Bear,  
456 2004; Matsuzaki et al., 2004). Therefore, it is possible there is a smaller contribution of GluN2B-  
457 NMDARs at larger spines. To address this, we examined the correlation between the effect of  
458 ifenprodil on mSCaTs at individual synapses and spine area. We found that spine area did not  
459 correlate with the magnitude of ifenprodil blockade on amplitude or frequency of mSCaTs  
460 (normalized amplitude: raw:  $R^2=0.006$ ,  $p=0.388$ ,  $n=127/6$ ; binned:  $R^2=0.050$ ,  $p=0.342$ ,  $n=20/6$ ;  
461 normalized frequency:  $R^2=0.012$ ,  $p=0.109$ ,  $n=221/6$ ; binned:  $R^2=0.059$ ,  $p=0.298$ ,  $n=20/6$ ) (Fig.  
462 3D). These data suggest that the contribution of GluN2B-NMDARs per synapse is not related to  
463 spine area.

464 Even though spine size is often related to synapse size (Harris et al., 2014), the PSD is  
465 much smaller than the spine itself, and is a highly dynamic structure that is strongly correlated to  
466 the size of the active zone across the cleft (Harris and Stevens, 1989; Schikorski and Stevens,  
467 1997; Inoue and Okabe, 2003; MacGillavry et al., 2013). Thus, to measure the area of the PSD  
468 itself using super-resolution microscopy, we turned to dSTORM imaging of the postsynaptic  
469 protein Shank. We matched mSCaT data to super-resolved PSDs for 47 synapses from 6  
470 neurons that were subjected to live GCaMP6f imaging followed by fixation and anti-Shank  
471 immunocytochemistry and dSTORM imaging (Fig. 3E, F, G, H). The mean PSD area was  $0.060$   
472  $\mu\text{m}^2 \pm 0.006$ , which is near the mean reported by electron microscopy of hippocampal synapses  
473 (mean  $\sim 0.069 \mu\text{m}^2$ ) (Harris and Stevens, 1989; Schikorski and Stevens, 1997; Shinohara et al.,  
474 2008). We found that mSCaT amplitude was not correlated with PSD area ( $R^2=0.013$ ,  $p=0.452$ ,  
475  $n= 47/6$ ) (Fig. 3I).

476 Taken together, this set of observations indicates that the size of the activated pool of  
477 NMDARs at individual synapses is independent of synapse size and that variability in the

478 magnitude of NMDAR activation observed between synapses for spontaneous release events is  
479 controlled by factors other than the size of the synapse itself.

480

481 mSCaT amplitude is correlated with synapse distance from the soma.

482 Another potential source of variability in mSCaT amplitude and frequency is the position  
483 of the synapse within the dendritic tree. In fact, NMDAR-mediated  $\text{Ca}^{2+}$  influx has been shown  
484 to be increased in synapses further from the cell body (Walker et al., 2017). We asked whether  
485 NMDAR activation by spontaneous glutamate release varies throughout the dendritic arbor as a  
486 function of distance from the soma or the number of branch points away from the soma (branch  
487 depth). We mapped neuronal morphology and identified spines along dendrites from z-stacks of  
488 GCaMP6f expressing neurons using semi-automatic neuron tracing and spine detection in  
489 Imaris (Fig. 4A, B, C) and identified spines in the traced image that had been  $\text{Ca}^{2+}$  imaged  
490 (Extended Data Figure 4-1). Mean mSCaT amplitude per spine was significantly correlated with  
491 distance from the soma ( $R^2=0.014$ ,  $p=0.036$   $n=316/9$ ) (Fig. 4C), as expected (Walker et al.,  
492 2017). Interestingly, even though branch depth was correlated with distance from the soma  
493 ( $R^2=0.022$ ,  $p<0.0001$ ; data not shown), branch depth did not correlate with mean mSCaT  
494 amplitude (raw data:  $R^2= 0.0007$ ,  $p=0.649$ ,  $n=287/9$ ) (Fig. 4E). In order to compare spines that  
495 are farther than  $\sim 200 \mu\text{m}$  away from the soma, we repeated these experiments using a lower  
496 power objective to increase the field of view. This allowed for a larger field of view and  
497 measurement of distances up to  $\sim 450 \mu\text{m}$  away from the soma. We observed that even at these  
498 longer distances, there was a correlation between mSCaT amplitude and distance from soma  
499 ( $R^2=0.041$ ,  $p<0.0001$   $n=746/6$ ) (Fig. 4D, E). Interestingly, when mSCaT amplitude was  
500 compared to branch depth at longer distances there was a correlation between mSCaT  
501 amplitude and branch depth ( $R^2=0.018$ ,  $p=0.0002$   $n=746/6$ ) (Fig. 4H,I). These results  
502 demonstrate the amount of NMDAR activation following spontaneous single vesicle release is  
503 related to the synapse distance from soma, and branch depth at more distal branches.

504 We then further asked whether GluN2B-NMDAR content varied based on synapse  
505 position. We found no correlation between the magnitude of the effect of ifenprodil with either  
506 distance from the soma (normalized frequency: raw data:  $R^2=0.007$ ,  $p=0.237$ ,  $n=209/9$ ; binned  
507 data:  $R^2=0.036$ ,  $p=0.422$ ,  $n=20/9$ ; normalized amplitude: raw data:  $R^2=0.006$ ,  $p=0.367$ ,  $n=132/9$ ;  
508 binned data:  $R^2=0.034$ ,  $p=0.434$ ,  $n=20/9$ ) (Fig. 4F) or branch depth (normalized frequency: raw  
509 data:  $R^2=0.005$ ,  $p=0.315$ ,  $n=209/9$ ; binned data:  $R^2=0.007$ ,  $p=0.721$ ,  $n=209/9$ ; normalized  
510 amplitude: raw data:  $R^2=0.0009$ ,  $p=0.729$ ,  $n=20/9$ ; binned data:  $R^2=0.00004$ ,  $p=0.978$ ,  $n=20/9$ )  
511 (Fig. 4J). Therefore, the amount of GluN2B-NMDAR activation is independent of synapse  
512 position within the dendritic arbor.

513 Overall, synapse position did loosely correlate with mSCaT amplitude, whereas spine  
514 and synapse size did not. Furthermore, the GluN2B component of mSCaTs is also independent  
515 of synapse size and position. Therefore, it likely that there are other factors besides size or  
516 position is responsible for the dramatic variability in spontaneous NMDAR activation between  
517 synapses.

518

519 **Discussion**

520

521 In the present study, we used an all-optical approach to characterize NMDAR activation  
522 following AP-independent (spontaneous) vesicle exocytosis at individual synapses of cultured  
523 hippocampal neurons. While GCaMP6f has frequently been used to measure mSCaTs  
524 (Andreae and Burrone, 2015; Sinnen et al., 2016; Tang et al., 2016; Walker et al., 2017), we  
525 clarified that it offers a large dynamic range and permits detailed analysis of the magnitude of  
526 receptor activation. Using this approach, we found that at nearly all synapses in this preparation,  
527 GluN2B-NMDARs are the major NMDAR subtype activated during spontaneous synaptic  
528 transmission. Additionally, we observed a surprising degree of variability in mSCaT amplitude  
529 both between and within synapses. In fact, the variation at single spines was comparable to the  
530 between-spine variation, which suggests that  $\text{Ca}^{2+}$  influx through the receptor may be  
531 surprisingly independent of synapse-specific features such as the number of receptors present  
532 at the synapse. Indeed, we demonstrated that spine size, PSD area, and synapse position have  
533 a relatively small impact on mSCaTs. Therefore, this high degree of variability is likely to be  
534 dominated by differences in release position, variations in the amount of glutamate per vesicle,  
535 and random fluctuations in channel open time.

536 We found that even in the absence of an AMPAR antagonist, application of 1 mM  $\text{Mg}^{2+}$ ,  
537 which is still below the physiological concentration, nearly eliminates all observable mSCaTs.  
538 This suggests that under more physiological conditions, in the absence of other activity, many  
539 spontaneous release events do not lead to sufficient membrane depolarization to relieve the  
540  $\text{Mg}^{2+}$  block on NMDARs, and thus result in little or no  $\text{Ca}^{2+}$  influx. Recent evidence  
541 demonstrates that glutamate binding to NMDARs can induce conformational changes in the  
542 receptor which lead to metabotropic signaling even in the absence of ion flux (Nabavi et al.,  
543 2013; Dore et al., 2016; Dore et al., 2017). Importantly, this type of NMDAR activation can  
544 mediate some forms of plasticity (Kessels et al., 2013; Aow et al., 2015; Dore et al., 2015; Stein

545 et al., 2015; Wong and Gray, 2018). Thus, our data suggest that under physiological conditions,  
546 effects of NMDAR activation by single-vesicle release events could be mediated principally by  
547 non-ionotropic functions rather than via  $\text{Ca}^{2+}$  influx.

548 Our data demonstrate that GluN2B-NMDARs contribute significantly to spontaneous  
549 events at all synapses and, at roughly half of synapses, are the primary NMDAR type activated  
550 by spontaneous release. This was somewhat surprising given the prevailing notion that GluN2B-  
551 NMDARs are not present at synapses after early development (Chen et al., 2000; Barth and  
552 Malenka, 2001; Ritter et al., 2002; Yashiro and Philpot, 2008). However, this is consistent with  
553 other reports (Sinnen et al., 2016; Walker et al., 2017) and a large and growing amount of  
554 evidence suggests that GluN2B-NMDARs are found at mature hippocampal synapses  
555 (Kellermayer et al., 2018) and they contribute significantly to synaptic events (Gray et al., 2011;  
556 Xiao et al., 2016; Levy et al., 2018). Thus, while it is clear that in some brain areas a  
557 developmental switch in NMDAR subtype is pronounced, in the hippocampus it is not as  
558 prominent. Spontaneous NMDAR activation has specialized functions within the synapse  
559 (Sutton et al., 2004; Sutton et al., 2006; Kavalali et al., 2011; Andrae and Burrone, 2015), and  
560 it is possible that these functions are specifically driven by GluN2B-NMDAR activation, rather  
561 than NMDAR activation in general. It will be important to assess whether GluN2B-NMDARs are  
562 required for the downstream signaling induced by spontaneous release.

563 We observed not only a large contribution of GluN2B-NMDARs to mSCaTs, but also a  
564 striking lack of  $\text{Ca}^{2+}$  influx mediated by GluN2A-NMDARs. Data regarding the contribution of  
565 NMDAR subtype to synaptic responses to spontaneous glutamate release has been mixed. In  
566 previous reports, knockout of GluN2A-NMDARs reduced or eliminated NMDA-mEPSCs in  
567 mature midbrain synapses (Townsend et al., 2003; Zhao and Constantine-Paton, 2007), thus  
568 suggesting the GluN2A-NMDARs are the principle responders to spontaneous release. This  
569 may be a region-specific effect, or, since GluN2A-NMDARs are essential for normal  
570 development of synapses in many brain regions (Gambrill and Barria, 2011; Gray et al., 2011;

571 Kannangara et al., 2014), it is possible that global GluN2A knockout alters synapses in other,  
572 unexpected ways.

573 While GluN2A-NMDARs did not contribute significantly to mSCaTs here, they are  
574 present at hippocampal synapses in culture and function in evoked neurotransmission  
575 (MacGillavry et al., 2013; Xiao et al., 2016; Kellermayer et al., 2018). Why they are less  
576 activated by spontaneous release? One option is that there is segregation of NMDARs such that  
577 the receptors activated by spontaneous release form a distinct pool, either a subset of or  
578 separate from those activated by evoked release. There is evidence to support this idea (Atasoy  
579 et al., 2008; Reese and Kavalali, 2016), and it possible that NMDAR subtype is specific to one  
580 pool or the other. A potential mechanism for restricting NMDAR activation is spatial segregation  
581 within the synapse. Indeed, within synapses, receptors are found to have a distinct nanoscale  
582 organization with subsynaptic high-density nanoclusters of postsynaptic proteins and AMPARs  
583 as well as GluN2B-NMDARs (Fukata et al., 2013; MacGillavry et al., 2013; Nair et al., 2013).  
584 And importantly, these postsynaptic nanodomains are aligned with presynaptic evoked release  
585 sites (Tang et al., 2016). Recently it has been demonstrated that within individual synapses,  
586 GluN2A- and GluN2B-NMDARs form distinct nanodomains that differ in size, number, and  
587 internal density (Kellermayer et al., 2018), further consistent with the idea that nano-  
588 organization could influence which receptor type is activated. Interestingly because of their  
589 biophysical properties, GluN2B-NMDARs are especially likely to be sensitive to their positioning  
590 with respect to the site of release; receptors within ~50 nm of the site of release three times  
591 more likely to open than those located ~200 nm from the site of release (Santucci and  
592 Raghavachari, 2008). Therefore, the position of release site with respect to NMDARs may  
593 restrict not just the total amount of NMDAR activation but also which synaptic NMDARs are able  
594 to be activated by spontaneous release. Further, mapping of release sites during spontaneous  
595 and evoked release revealed that these release modes display different spatial patterns within  
596 the active zone (Tang et al., 2016). Given the possibility that GluN2B-NMDARs are positioned



597 within the synapses as to be relevant for spontaneous release, the contribution of GluN2B-  
598 NMDARs to events in mature synapses may have been underestimated due to a focus on  
599 evoked release.

600 In addition to GluN2B-NMDARs and GluN2A-NMDARs, there is also a significant  
601 population of triheteromeric receptors (GluN2A/B-NMDARs) thought to be at mature  
602 hippocampal synapses (Rauner and Köhr, 2011; Paoletti et al., 2013; Tovar et al., 2013;  
603 Stroebel et al., 2018). Unfortunately, these are difficult to study in situ due to a lack of specific  
604 pharmacological agents. Based on dose-inhibition curves for ifenprodil for the different receptor  
605 subtypes, the ifenprodil concentration utilized here blocked nearly all GluN2B-NMDAR activation  
606 ( $IC_{50}$ : 0.15  $\mu$ M), but also ~20% of any GluN2A/B-NMDAR-mediated response, though is  
607 expected to have had no impact on GluN2A-NMDARs ( $IC_{50}$ : >20  $\mu$ M) (Paoletti, 2011; Hansen et  
608 al., 2014; Stroebel et al., 2014), Though it is difficult with existing reagents to specify how  
609 prominent their role is, triheteromeric receptors thus probably contribute to some spontaneous  
610 events. However, based on the dramatic reduction in the number of events with ifenprodil  
611 treatment, it is likely that GluN2B-NMDARs mediates the majority of the  $Ca^{2+}$  influx due to  
612 spontaneous release.

613 We observed a high degree of variability in mSCaT amplitude both between and within  
614 synapses. Differences in the number of receptors activated per event or the NMDAR subtype  
615 activated could underlie variability in event amplitude. If the number of NMDARs activated per  
616 event was dominating this inter-event variability, then this would lead to the prediction that some  
617 synapses with more NMDARs, or a higher density of NMDARs apposed to release sites would  
618 have overall larger events. One consequence of this would be that the variability within a single  
619 synapse would be smaller than the variability between synapses. However, we observed a  
620 similar amount of mSCaT amplitude variability within synapses as between synapses, thus  
621 difference in the number of NMDARs able to be activated between synapses is not likely the  
622 dominant source of variability. GluN2B-NMDARs have longer open times and longer burst

623 duration than GluN2A-NMDARs but have a much lower open probability, suggesting that they  
624 may contribute more to variability in the amount of  $\text{Ca}^{2+}$  influx per event (Santucci and  
625 Raghavachari, 2008). In fact, in single-channel recordings, ifenprodil reduces variability of  
626 NMDAR total open time (Pina-Crespo and Gibb, 2002). Consistent with this prediction, we  
627 observed there was a decrease in mean CV of mSCaT amplitude from 0.6 to 0.5 following  
628 ifenprodil treatment. This suggests that variability in  $\text{Ca}^{2+}$  influx through GluN2B-NMDARs  
629 substantially contributes to the differences in mSCaT amplitude between events, and that  $\text{Ca}^{2+}$   
630 influx through activated GluN2A-NMDARs is less variable.

631 Spine size was not substantially correlated with the amount of  $\text{Ca}^{2+}$  influx per event.  
632 Similarly, NMDAR activation does not scale with spine size following glutamate uncaging  
633 (Sobczyk et al., 2005; Takasaki and Sabatini, 2014) or evoked release (Nimchinsky et al.,  
634 2004). Together, these observations indicate that the amount of NMDAR activation is  
635 independent from spine size for both release modes. Another spine feature that may alter  
636 mSCaT amplitude and contribute to variability is spine neck diameter, since this could alter  $\text{Ca}^{2+}$   
637 retention in the spine (Svoboda et al., 1996) Additionally, while we did not measure a strong  
638 correlation between spine size and mSCaT amplitude, it is nevertheless possible that small  
639 fluctuations in spine area during the course of the experiment could contribute slightly to the  
640 variability observed in mSCaT amplitude. Furthermore, PSD size measured with correlative  
641 super-resolution imaging was also unrelated to NMDAR activation. We did observe a weak  
642 negative correlation between spine size and mSCaT amplitude, however, we suspect that this is  
643 due to a decrease not in actual  $\text{Ca}^{2+}$  influx, but in the ratio of  $\text{Ca}^{2+}$  influx to total GCaMP6f in the  
644 compartment (that is, very large spines have a large basal F).

645 It is worth highlighting this novel combination of super-resolution imaging with functional  
646 measures at individual synapses. Nanoscale protein organization is hypothesized to control  
647 many aspects of synaptic function and signaling (Bourne and Harris, 2012; Choquet and Triller,  
648 2013; Biederer et al., 2017; Chamma and Thoumine, 2018), so this correlative approach will be

649 important for future tests of how NMDAR activation is impacted by other nanoscale synaptic  
650 features, such as the presence of subsynaptic scaffold nanoclusters (Fukata et al., 2013;  
651 MacGillavry et al., 2013; Nair et al., 2013; Broadhead et al., 2016; Tang et al., 2016). Rapidly  
652 improving and diversifying sensors for neurotransmitters and intracellular messengers (Marvin  
653 et al., 2013; Mehta et al., 2018; Ross et al., 2018), also suggest that it will be possible to more  
654 directly measure the link between synapse nanostructure and both the ionotropic and non-  
655 ionotropic activity of the receptor. Conversely, synaptic function can alter subsynaptic protein  
656 distributions, potentially mediating aspects of functional plasticity (Glebov et al., 2017; Chen et  
657 al., 2018). We anticipate the correlative approach will be integral for exploration of dynamic  
658 synaptic signaling.

659 In another series of experiments, we asked whether synapse distance from the soma or  
660 degree of branch complexity plays a role in variability in the amount of NMDAR activation.  
661 Previous work has suggested that NMDAR-mediated  $\text{Ca}^{2+}$  influx is larger at synapses further  
662 away from the soma (Walker et al., 2017). Our data was consistent with this finding and  
663 revealed a significant correlation of mSCaT amplitude with the distance of the synapse from the  
664 soma, but not with branch complexity. However, there is evidence that spine size is correlated  
665 with distance from the soma and that more distal synapses tend to be smaller than those more  
666 proximal (Katz et al., 2009; Walker et al., 2017). Therefore, the relationship between spine  
667 distance and event amplitude may in part arise simply from a larger proportional  $\text{Ca}^{2+}$  influx at a  
668 subset of distal spines that are much smaller than proximal spines. Additionally, we found that  
669 the amount of blockade with ifenprodil was unrelated to synapse position. Overall, we conclude  
670 that despite a slight correlation between synapse position and mSCaT amplitude, synapse  
671 position is not a primary modulator of NMDAR-mediated  $\text{Ca}^{2+}$  influx between synapses.

672 Major remaining options for the source of variability in NMDAR activation are  
673 phosphorylation state of NMDARs, presynaptic changes in the amount of glutamate released  
674 between events, or finally, random variation in channel open time. Phosphorylation of the

675 NMDAR can modify channel conductance and lead to changes in  $\text{Ca}^{2+}$  influx (Wang and Salter,  
676 1994; Salter and Kalia, 2004; Skeberdis et al., 2006; Chen and Roche, 2007). These changes  
677 can occur on the timescale of minutes (Wang and Salter, 1994), which while not completely  
678 incompatible with our average mSCaT frequency of ~2 events per minute, is unlikely to have  
679 contributed substantially to within-synapse variance in our experiments. However, it has been  
680 shown that preventing receptor phosphorylation alters basal transmission (Wang and Salter,  
681 1994; Skeberdis et al., 2006), which suggests that there is some basal level of NMDAR  
682 phosphorylation ongoing that can modify NMDAR properties. Thus, while it is unclear whether  
683 NMDAR receptor phosphorylation would be sufficient to mediate the large amount of variability  
684 observed within synapses, it appears able to play a role in distinguishing NMDAR-mediated  
685  $\text{Ca}^{2+}$  influx between synapses.

686         Differences in the amount of glutamate release per event have long been thought to be a  
687 major contributor to variability in the amount of receptor activation by spontaneous release  
688 (Bekkers et al., 1990; Liu et al., 1999; McAllister and Stevens, 2000; Hanse and Gustafsson,  
689 2001; Franks et al., 2003). Modeling the amount of AMPAR activation with varying quantal size  
690 has demonstrated an increase in the number of activated receptors as glutamate molecules per  
691 vesicle is increased (Franks et al., 2003). Despite the likely small number of NMDARs activated  
692 per event (Nimchinsky et al., 2004), it is possible that there is variability in the number of  
693 NMDARs activated that is in part due to differences in the amount of glutamate released at each  
694 event. In addition to the amount of glutamate per vesicle, the release site position with respect  
695 to receptor position could also underlie variability in the amount of receptor activation. Modeling  
696 receptor activation due to glutamate release at different distances from the highest density of  
697 receptors has suggested that release site position could play a large role in the variability in  
698 response amplitude (Uteshev and Pennefather, 1996; MacGillavry et al., 2013; Savtchenko and  
699 Rusakov, 2013). Especially in the case of spontaneous release which may occur more randomly  
700 across the active zone than evoked release (Tang et al., 2016), release position may play a role

701 in inter-event variability. Finally, another likely source of variability in  $\text{Ca}^{2+}$  influx per event is  
702 stochastic channel open-close transitions (Franks et al., 2003). GluN2B-NMDARs have a  
703 relatively low open probability (Chen et al., 1999), which could produce large essentially random  
704 changes in the amount of  $\text{Ca}^{2+}$  influx per event (Yeung et al., 2004; Zeng and Holmes, 2010).  
705 Especially in this case where there are very few NMDARs activated per event, these random  
706 fluctuations could dominate the variability.

707 Overall, we conclude that the high degree of variability in the amount of  $\text{Ca}^{2+}$  influx  
708 through spontaneous activated NMDARs is not primarily due to synapse-specific features  
709 including the number of available receptors, NMDAR subtype, synapse size, or synapse  
710 position within the dendritic tree. Rather, the high degree of variability of spontaneous NMDAR  
711 activation is most likely dominated by nanoscale intrinsic properties of the synapse that  
712 influence receptor activation probability, including receptor position, release site position, and  
713 the glutamate concentration profile following each release event, and by the highly varying open  
714 time of the channels that do become activated.

715

716 **References**

- 717 Andrae LC, Ben Fredj N, Burrone J (2012) Independent Vesicle Pools Underlie Different  
718 Modes of Release during Neuronal Development. *Journal of Neuroscience* 32:1867-  
719 1874.
- 720 Andrae LC, Burrone J (2015) Spontaneous Neurotransmitter Release Shapes Dendritic Arbors  
721 via Long-Range Activation of NMDA Receptors. *Cell Reports* 10:873-882.
- 722 Aoto J, Nam CI, Poon MM, Ting P, Chen L (2008) Synaptic Signaling by All-Trans Retinoic Acid  
723 in Homeostatic Synaptic Plasticity. *Neuron* 60:308-320.
- 724 Aow J, Dore K, Malinow R (2015) Conformational signaling required for synaptic plasticity by the  
725 NMDA receptor complex. *Proceedings of the National Academy of Sciences* 112:14711-  
726 14716.
- 727 Araki Y, Zeng M, Zhang M, Hugarir Richard LL (2015) Rapid Dispersion of SynGAP from  
728 Synaptic Spines Triggers AMPA Receptor Insertion and Spine Enlargement during LTP.  
729 *Neuron* 85:173-189.
- 730 Ascher P, Nowak L (1988) The role of divalent cations in the N-methyl-D-aspartate responses of  
731 mouse central neurones in culture. *The Journal of physiology* 399:247-266.
- 732 Atasoy D, Ertunc M, Moulder KL, Blackwell J, Chung C, Su J, Kavalali ET (2008) Spontaneous  
733 and Evoked Glutamate Release Activates Two Populations of NMDA Receptors with  
734 Limited Overlap. *The Journal of neuroscience : the official journal of the Society for*  
735 *Neuroscience* 28:10151-10166.
- 736 Autry AE, Adachi M, Nosyreva E, Na ES, Los MF, Cheng PF, Kavalali ET, Monteggia LM (2011)  
737 NMDA receptor blockade at rest triggers rapid behavioural antidepressant responses.  
738 *Nature* 475:91-96.
- 739 Barth AL, Malenka RC (2001) NMDAR EPSC kinetics do not regulate the critical period for LTP  
740 at thalamocortical synapses. *Nat Neurosci* 4:235-236.
- 741 Bekkers JM, Stevens CF (1989) NMDA and non-NMDA receptors are co-localized at individual  
742 excitatory synapses in cultured rat hippocampus. *Nature* 341:230-233.
- 743 Bekkers JM, Richerson GB, Stevens CF (1990) Origin of variability in quantal size in cultured  
744 hippocampal neurons and hippocampal slices. *Proc Natl Acad Sci U S A* 87:5359-5362.
- 745 Biederer T, Kaeser PS, Blanpied TA (2017) Transcellular Nanoalignment of Synaptic Function.  
746 *Neuron* 96:680-696.
- 747 Bourne JN, Harris KM (2012) Nanoscale analysis of structural synaptic plasticity. *Curr Opin*  
748 *Neurobiol* 22:372-382.
- 749 Broadhead MJ, Horrocks MH, Zhu F, Muresan L, Benavides-Piccione R, DeFelipe J, Fricker D,  
750 Kopanitsa MV, Duncan RR, Klenerman D, Komiyama NH, Lee SF, Grant SGN (2016)  
751 PSD95 nanoclusters are postsynaptic building blocks in hippocampus circuits. *Scientific*  
752 *Reports* 6:24626.
- 753 Chamma I, Thoumine O (2018) Dynamics, nanoscale organization, and function of synaptic  
754 adhesion molecules. *Mol Cell Neurosci* 91:95-107.
- 755 Chen BS, Roche KW (2007) Regulation of NMDA receptors by phosphorylation.  
756 *Neuropharmacology* 53:362-368.
- 757 Chen H, Tang A-H, Blanpied TA, Burrone J, Holzbaaur E (2018) Subsynaptic spatial organization  
758 as a regulator of synaptic strength and plasticity Transsynaptic alignment can control  
759 synaptic function. *Current Opinion in Neurobiology* 51:147-153.
- 760 Chen L, Cooper NG, Mower GD (2000) Developmental changes in the expression of NMDA  
761 receptor subunits (NR1, NR2A, NR2B) in the cat visual cortex and the effects of dark  
762 rearing. *Brain Res Mol Brain Res* 78:196-200.
- 763 Chen N, Luo T, Raymond LA (1999) Subtype-dependence of NMDA receptor channel open  
764 probability. *J Neurosci* 19:6844-6854.

- 765 Chen X, Levy JM, Hou A, Winters C, Azzam R, Sousa AA, Leapman RD, Nicoll RA, Reese TS  
766 (2015) PSD-95 family MAGUKs are essential for anchoring AMPA and NMDA receptor  
767 complexes at the postsynaptic density. *Proceedings of the National Academy of*  
768 *Sciences of the United States of America* 112:E6983-6992.
- 769 Choquet D, Triller A (2013) The dynamic synapse. *Neuron* 80:691-703.
- 770 Cummings JA, Mulkey RM, Nicoll RA, Malenka RC (1996) Ca<sup>2+</sup> signaling requirements for  
771 long-term depression in the hippocampus. *Neuron* 16:825-833.
- 772 Dore K, Aow J, Malinow R (2015) Agonist binding to the NMDA receptor drives movement of its  
773 cytoplasmic domain without ion flow. *Proceedings of the National Academy of Sciences*  
774 112:14705-14710.
- 775 Dore K, Aow J, Malinow R (2016) The emergence of NMDA receptor metabotropic function:  
776 Insights from imaging. *Frontiers in Synaptic Neuroscience* 8:1-9.
- 777 Dore K, Stein IS, Brock JA, Castillo PE, Zito K, Sjöström PJ (2017) Unconventional NMDA  
778 Receptor Signaling. *Journal of Neuroscience* 37:10800-10807.
- 779 Dupuis JP et al. (2014) Surface dynamics of GluN2B-NMDA receptors controls plasticity of  
780 maturing glutamate synapses. *The EMBO journal* 33:1-20.
- 781 El-Husseini AED, Schnell E, Chetkovich DM (2000) PSD-95 involvement in maturation of  
782 excitatory synapses. *Science* 290:1364-1368.
- 783 Foster KA, McLaughlin N, Edbauer D, Phillips M, Bolton A, Constantine-Paton M, Sheng M  
784 (2010) Distinct roles of NR2A and NR2B cytoplasmic tails in long-term potentiation. *J*  
785 *Neurosci* 30:2676-2685.
- 786 Frank CA, Kennedy MJ, Goold Carleton PP, Marek KW, Davis Graeme WW (2006)  
787 Mechanisms Underlying the Rapid Induction and Sustained Expression of Synaptic  
788 Homeostasis. *Neuron* 52:663-677.
- 789 Franks KM, Stevens CF, Sejnowski TJ (2003) Independent sources of quantal variability at  
790 single glutamatergic synapses. *The Journal of neuroscience : the official journal of the*  
791 *Society for Neuroscience* 23:3186-3195.
- 792 Fredj NB, Burrone J (2009) A resting pool of vesicles is responsible for spontaneous vesicle  
793 fusion at the synapse. *Nature Neuroscience* 12:751-758.
- 794 Fukata Y, Dimitrov A, Boncompain G, Vielemeyer O, Perez F, Fukata M (2013) Local  
795 palmitoylation cycles define activity-regulated postsynaptic subdomains. *Journal of Cell*  
796 *Biology* 202:145-161.
- 797 Gambrell AC, Barria A (2011) NMDA receptor subunit composition controls synaptogenesis and  
798 synapse stabilization. *Proc Natl Acad Sci U S A* 108:5855-5860.
- 799 Glebov OO, Jackson RE, Winterflood CM, Owen DM, Barker EA, Doherty P, Ewers H, Burrone  
800 J (2017) Nanoscale Structural Plasticity of the Active Zone Matrix Modulates Presynaptic  
801 Function. *Cell Reports* 18:2715-2728.
- 802 Gray JA, Shi Y, Usui H, During MJ, Sakimura K, Nicoll RA (2011) Distinct modes of AMPA  
803 receptor suppression at developing synapses by GluN2A and GluN2B: single-cell NMDA  
804 receptor subunit deletion in vivo. *Neuron* 71:1085-1101.
- 805 Groemer TW, Klingauf J (2007) Synaptic vesicles recycling spontaneously and during activity  
806 belong to the same vesicle pool. *Nat Neurosci* 10:145-147.
- 807 Hanse E, Gustafsson B (2001) Quantal variability at glutamatergic synapses in area CA1 of the  
808 rat neonatal hippocampus. *J Physiol* 531:467-480.
- 809 Hansen KB, Ogden KK, Yuan H, Traynelis SF (2014) Distinct functional and pharmacological  
810 properties of Triheteromeric GluN1/GluN2A/GluN2B NMDA receptors. *Neuron* 81:1084-  
811 1096.
- 812 Hardingham GE, Arnold FJ, Bading H (2001) A calcium microdomain near NMDA receptors: on  
813 switch for ERK-dependent synapse-to-nucleus communication. *Nature neuroscience*  
814 4:565-566.

- 815 Hardingham GE, Bading H (2003) The Yin and Yang of NMDA receptor signalling. *Trends in*  
816 *Neurosciences* 26:81-89.
- 817 Harris KM, Stevens JK (1989) Dendritic spines of CA 1 pyramidal cells in the rat hippocampus:  
818 serial electron microscopy with reference to their biophysical characteristics. *The Journal*  
819 *of neuroscience : the official journal of the Society for Neuroscience* 9:2982-2997.
- 820 Harris KM, Weinberg RJ, Hill C, Carolina N (2014) Ultrastructure of Synapses in the Mammalian  
821 Brain.
- 822 Higley MJ, Sabatini BL (2012) Calcium signaling in dendritic spines. *Cold Spring Harbor*  
823 *perspectives in biology* 4:a005686-a005686.
- 824 Hua Y, Sinha R, Martineau M, Kahms M, Klingauf J (2010) A common origin of synaptic  
825 vesicles undergoing evoked and spontaneous fusion. *Nat Neurosci* 13:1451-1453.
- 826 Huganir RL, Nicoll RA (2013) AMPARs and synaptic plasticity: The last 25 years. *Neuron*  
827 80:704-717.
- 828 Inoue A, Okabe S (2003) The dynamic organization of postsynaptic proteins: translocating  
829 molecules regulate synaptic function. *Curr Opin Neurobiol* 13:332-340.
- 830 Kannangara TS, Bostrom CA, Ratzlaff A, Thompson L, Cater RM, Gil-Mohapel J, Christie BR  
831 (2014) Deletion of the NMDA receptor GluN2A subunit significantly decreases dendritic  
832 growth in maturing dentate granule neurons. *PLoS One* 9:e103155.
- 833 Katz Y, Menon V, Nicholson DA, Geinisman Y, Kath WL, Spruston N (2009) Synapse  
834 Distribution Suggests a Two-Stage Model of Dendritic Integration in CA1 Pyramidal  
835 Neurons. *Neuron* 63:171-177.
- 836 Kavalali ET, Chung C, Khvotchev M, Leitz J, Nosyreva E, Raingo J, Ramirez DMO (2011)  
837 Spontaneous neurotransmission: an independent pathway for neuronal signaling?  
838 *Physiology (Bethesda, Md)* 26:45-53.
- 839 Kellermayer B, Ferreira JS, Dupuis J, Levet F, Grillo-Bosch D, Bard L, Linares-Loyez J, Bouchet  
840 D, Choquet D, Rusakov DA, Bon P, Sibarita JB, Cognet L, Sainlos M, Carvalho AL, Groc  
841 L (2018) Differential Nanoscale Topography and Functional Role of GluN2-NMDA  
842 Receptor Subtypes at Glutamatergic Synapses. *Neuron*.
- 843 Kennedy MB (2000) Signal-Processing Machines at the Postsynaptic Density. *Science* 290:750-  
844 754.
- 845 Kessels HW, Nabavi S, Malinow R (2013) Metabotropic NMDA receptor function is required for  
846 beta-amyloid-induced synaptic depression. *Proc Natl Acad Sci U S A* 110:4033-4038.
- 847 Kharazia VN, Weinberg RJ, Hill C, Carolina N (1999) Immunogold Localization of AMPA and  
848 NMDA Receptors in Somatic. 302:292-302.
- 849 Kuner T, Schoepfer R (1996) Multiple structural elements determine subunit specificity of Mg<sup>2+</sup>  
850 block in NMDA receptor channels. *The Journal of neuroscience : the official journal of*  
851 *the Society for Neuroscience* 16:3549-3558.
- 852 Levy AD, Xiao X, Shaw JE, Sudarsana Devi SP, Katrancha SM, Bennett AM, Greer CA, Howe  
853 JR, Machida K, Koleske AJ (2018) Noonan Syndrome-Associated SHP2  
854 Dephosphorylates GluN2B to Regulate NMDA Receptor Function. *Cell Rep* 24:1523-  
855 1535.
- 856 Liu G, Choi S, Tsien RW (1999) Variability of neurotransmitter concentration and nonsaturation  
857 of postsynaptic AMPA receptors at synapses in hippocampal cultures and slices. *Neuron*  
858 22:395-409.
- 859 MacDermott AB, Mayer ML, Westbrook GL, Smith SJ, Barker JL (1986) NMDA-receptor  
860 activation increases cytoplasmic calcium concentration in cultured spinal cord neurones.  
861 *Nature* 321:519-522.
- 862 MacGillavry HD, Song Y, Raghavachari S, Blanpied Ta (2013) Nanoscale scaffolding domains  
863 within the postsynaptic density concentrate synaptic AMPA receptors. *Neuron* 78:615-  
864 622.
- 865 Malenka RC, Bear MF (2004) LTP and LTD: An embarrassment of riches. *Neuron* 44:5-21.



- 866 Marvin JS, Borghuis BG, Tian L, Cichon J, Harnett MT, Akerboom J, Gordus A, Renninger SL,  
867 Chen T-W, Bargmann CI, Orger MB, Schreier ER, Demb JB, Gan W-B, Hires SA,  
868 Looger LL (2013) An optimized fluorescent probe for visualizing glutamate  
869 neurotransmission. *Nature methods* 10:162-170.
- 870 Masanori Matsuzaki NHGCRE-D, Haruo K, Department (2004) Structural basis of long-term  
871 potentiation in single dendritic spines. *Nature* 429:761-766.
- 872 Matsuzaki M, Ellis-Davies GC, Nemoto T, Miyashita Y, Iino M, Kasai H (2001) Dendritic spine  
873 geometry is critical for AMPA receptor expression in hippocampal CA1 pyramidal  
874 neurons. *Nature neuroscience* 4:1086-1092.
- 875 Matsuzaki M, Honkura N, Ellis-Davies GCR, Kasai H (2004) Structural basis of long-term  
876 potentiation in single dendritic spines. *Nature*.
- 877 McAllister aK, Stevens CF (2000) Nonsaturation of AMPA and NMDA receptors at hippocampal  
878 synapses. *Proceedings of the National Academy of Sciences of the United States of*  
879 *America* 97:6173-6178.
- 880 Mehta S, Zhang Y, Roth RH, Zhang JF, Mo A, Tenner B, Hugarir RL, Zhang J (2018) Single-  
881 fluorophore biosensors for sensitive and multiplexed detection of signalling activities. *Nat*  
882 *Cell Biol* 20:1215-1225.
- 883 Nabavi S, Kessels HW, Alfonso S, Aow J, Fox R, Malinow R (2013) Metabotropic NMDA  
884 receptor function is required for NMDA receptor-dependent long-term depression.  
885 *Proceedings of the National Academy of Sciences of the United States of America*  
886 110:4027-4032.
- 887 Nair D, Hosy E, Petersen JD, Constals A, Giannone G, Choquet D, Sibarita J-B (2013) Super-  
888 resolution imaging reveals that AMPA receptors inside synapses are dynamically  
889 organized in nanodomains regulated by PSD95. *The Journal of neuroscience : the*  
890 *official journal of the Society for Neuroscience* 33:13204-13224.
- 891 Nimchinsky EA, Yasuda R, Oertner TG, Svoboda K (2004) The Number of Glutamate  
892 Receptors Opened by Synaptic Stimulation in Single Hippocampal Spines. In.
- 893 Paoletti P (2011) Molecular basis of NMDA receptor functional diversity. *The European journal*  
894 *of neuroscience* 33:1351-1365.
- 895 Paoletti P, Bellone C, Zhou Q (2013) NMDA receptor subunit diversity: impact on receptor  
896 properties, synaptic plasticity and disease. *Nature reviews Neuroscience* 14:383-400.
- 897 Pina-Crespo JC, Gibb AJ (2002) Subtypes of NMDA receptors in new-born rat hippocampal  
898 granule cells. *J Physiol* 541:41-64.
- 899 Prange O, Murphy TH (1999) Correlation of miniature synaptic activity and evoked release  
900 probability in cultures of cortical neurons. *J Neurosci* 19:6427-6438.
- 901 Prybylowski K, Wenthold RJ (2004) N-Methyl-D-aspartate receptors: subunit assembly and  
902 trafficking to the synapse. *The Journal of biological chemistry* 279:9673-9676.
- 903 Prybylowski K, Chang K, Sans N, Kan L, Vicini S, Wenthold RJ (2005) The synaptic localization  
904 of NR2B-containing NMDA receptors is controlled by interactions with PDZ proteins and  
905 AP-2. *Neuron* 47:845-857.
- 906 Ramirez DMO, Kavalali ET (2011) Differential regulation of spontaneous and evoked  
907 neurotransmitter release at central synapses. *Current Opinion in Neurobiology* 21:275-  
908 282.
- 909 Rauner C, Köhr G (2011) Triheteromeric NR1/NR2A/NR2B receptors constitute the major N-  
910 methyl-D-aspartate receptor population in adult hippocampal synapses. *The Journal of*  
911 *biological chemistry* 286:7558-7566.
- 912 Reese AL, Kavalali ET (2015) Spontaneous neurotransmission signals through store-driven Ca  
913 <sup>2+</sup> transients to maintain synaptic homeostasis. *eLife* 4:1-15.
- 914 Reese AL, Kavalali ET (2016) Single synapse evaluation of the postsynaptic NMDA receptors  
915 targeted by evoked and spontaneous neurotransmission. *eLife* 5:e21170-e21170.

- 916 Ritter LM, Vazquez DM, Meador-Woodruff JH (2002) Ontogeny of ionotropic glutamate receptor  
917 subunit expression in the rat hippocampus. *Brain Res Dev Brain Res* 139:227-236.
- 918 Ross BL, Tenner B, Markwardt ML, Zviman A, Shi G, Kerr JP, Snell NE, McFarland JJ, Mauban  
919 JR, Ward CW, Rizzo MA, Zhang J (2018) Single-color, ratiometric biosensors for  
920 detecting signaling activities in live cells. *Elife* 7.
- 921 Salter MW, Kalia LV (2004) Src kinases: a hub for NMDA receptor regulation. *Nat Rev Neurosci*  
922 5:317-328.
- 923 Sanhueza M, Fernandez-Villalobos G, Stein IS, Kasumova G, Zhang P, Bayer KU, Otmakhov  
924 N, Hell JW, Lisman J (2011) Role of the CaMKII/NMDA receptor complex in the  
925 maintenance of synaptic strength. *The Journal of neuroscience : the official journal of the*  
926 *Society for Neuroscience* 31:9170-9178.
- 927 Santucci DM, Raghavachari S (2008) The effects of NR2 subunit-dependent NMDA receptor  
928 kinetics on synaptic transmission and CaMKII activation. *PLoS computational biology*  
929 4:e1000208-e1000208.
- 930 Sara Y, Virmani T, Deák F, Liu X, Kavalali ET (2005) An isolated pool of vesicles recycles at  
931 rest and drives spontaneous neurotransmission. *Neuron* 45:563-573.
- 932 Sara Y, Bal M, Adachi M, Monteggia LM, Kavalali ET (2011) Use-Dependent AMPA Receptor  
933 Block Reveals Segregation of Spontaneous and Evoked Glutamatergic  
934 Neurotransmission. 31:5378-5382.
- 935 Savtchenko LP, Rusakov DA (2013) Moderate AMPA receptor clustering on the nanoscale can  
936 efficiently potentiate synaptic current.
- 937 Schikorski T, Stevens CF (1997) Quantitative ultrastructural analysis of hippocampal excitatory  
938 synapses. *The Journal of neuroscience : the official journal of the Society for*  
939 *Neuroscience* 17:5858-5867.
- 940 Shinohara Y, Hirase H, Watanabe M, Itakura M, Takahashi M, Shigemoto R, Y S, H H, M W, M  
941 I, M T, R S (2008) Left-right asymmetry of the hippocampal synapses with differential  
942 subunit allocation of glutamate receptors. *Proceedings of the National Academy of*  
943 *Sciences of the United States of America* 105:19498-19503.
- 944 Shipton Oa, Paulsen O (2014a) GluN2A and GluN2B subunit-containing NMDA receptors in  
945 hippocampal plasticity. *Philosophical transactions of the Royal Society of London Series*  
946 *B, Biological sciences* 369:20130163-20130163.
- 947 Shipton Oa, Paulsen O (2014b) NMDA receptors in hippocampal plasticity.
- 948 Sinnen BL, Bowen AB, Gibson ES, Kennedy MJ (2016) Local and Use-Dependent Effects of -  
949 Amyloid Oligomers on NMDA Receptor Function Revealed by Optical Quantal Analysis.  
950 *Journal of Neuroscience* 36:11532-11543.
- 951 Skeberdis VA, Chevaleyre V, Lau CG, Goldberg JH, Pettit DL, Suadcani SO, Lin Y, Bennett  
952 MV, Yuste R, Castillo PE, Zukin RS (2006) Protein kinase A regulates calcium  
953 permeability of NMDA receptors. *Nat Neurosci* 9:501-510.
- 954 Sobczyk A, Scheuss V, Svoboda K (2005) NMDA receptor subunit-dependent [Ca<sup>2+</sup>] signaling  
955 in individual hippocampal dendritic spines. *The Journal of neuroscience : the official*  
956 *journal of the Society for Neuroscience* 25:6037-6046.
- 957 Stein IS, Gray Ja, Zito K (2015) Non-Ionotropic NMDA Receptor Signaling Drives Activity-  
958 Induced Dendritic Spine Shrinkage. *Journal of Neuroscience* 35:12303-12308.
- 959 Stroebel D, Carvalho S, Grand T, Zhu S, Paoletti P (2014) Controlling NMDA Receptor Subunit  
960 Composition Using Ectopic Retention Signals. *Journal of Neuroscience* 34:16630-16636.
- 961 Stroebel D, Casado M, Paoletti P (2018) Triheteromeric NMDA receptors: from structure to  
962 synaptic physiology. *Current Opinion in Physiology* 2:1-12.
- 963 Sutton MA, Wall NR, Aakalu GN, Schuman EM (2004) Regulation of Dendritic Protein Synthesis  
964 by Miniature Synaptic Events Michael. *Science* 304:1979-1983.

- 965 Sutton MA, Ito HT, Cressy P, Kempf C, Woo JC, Schuman EM (2006) Miniature  
966 neurotransmission stabilizes synaptic function via tonic suppression of local dendritic  
967 protein synthesis. *Cell* 125:785-799.
- 968 Sutton Ma, Taylor AM, Ito HT, Pham A, Schuman EM (2007) Postsynaptic Decoding of Neural  
969 Activity: eEF2 as a Biochemical Sensor Coupling Miniature Synaptic Transmission to  
970 Local Protein Synthesis. *Neuron* 55:648-661.
- 971 Svoboda K, Tank DW, Denk W (1996) Direct measurement of coupling between dendritic  
972 spines and shafts. *Science* 272:716-719.
- 973 Takasaki K, Sabatini BL (2014) Super-resolution 2-photon microscopy reveals that the  
974 morphology of each dendritic spine correlates with diffusive but not synaptic properties.  
975 *Frontiers in Neuroanatomy* 8:1-7.
- 976 Takumi Y, Ramírez-león V, Laake P, Rinvik E, Ottersen OP (1999) Different modes of  
977 expression of AMPA and NMDA receptors in hippocampal synapses. 2.
- 978 Tang A-H, Chen H, Li TP, Metzbower SR, MacGillavry HD, Blanpied TA (2016) A trans-synaptic  
979 nanocolumn aligns neurotransmitter release to receptors. *Nature* 536:210-214.
- 980 Tovar KR, McGinley MJ, Westbrook GL (2013) Triheteromeric NMDA receptors at hippocampal  
981 synapses. *The Journal of neuroscience : the official journal of the Society for*  
982 *Neuroscience* 33:9150-9160.
- 983 Townsend M, Yoshii A, Mishina M, Constantine-Paton M (2003) Developmental loss of  
984 miniature N-methyl-D-aspartate receptor currents in NR2A knockout mice. *Proceedings*  
985 *of the National Academy of Sciences of the United States of America* 100:1340-1345.
- 986 Uteshev VV, Pennefather PS (1996) A mathematical description of miniature postsynaptic  
987 current generation at central nervous system synapses. *Biophys J* 71:1256-1266.
- 988 Walker AS, Neves G, Grillo F, Jackson RE, Rigby M, Donnell CO, Lowe AS, Vizcay-barrena G,  
989 Fleck RA, Burrone J (2017) Distance-dependent gradient in NMDAR-driven spine  
990 calcium signals along tapering dendrites.
- 991 Wang YT, Salter MW (1994) Regulation of NMDA receptors by tyrosine kinases and  
992 phosphatases. *Nature* 369:233-235.
- 993 Watt AJ, Sjöström PJ, Häusser M, Nelson SB, Turrigiano GG (2004) A proportional but slower  
994 NMDA potentiation follows AMPA potentiation in LTP. *Nature neuroscience* 7:518-524.
- 995 Wilhelm BG, Groemer TW, Rizzoli SO (2010) The same synaptic vesicles drive active and  
996 spontaneous release. *Nat Neurosci* 13:1454-1456.
- 997 Wong JM, Gray JA (2018) Long-term depression is independent of GluN2 subunit composition.  
998 *The Journal of Neuroscience* 38:0394-0318.
- 999 Xiao X, Levy AD, Rosenberg BJ, Higley MJ, Koleske AJ (2016) Disruption of Coordinated  
1000 Presynaptic and Postsynaptic Maturation Underlies the Defects in Hippocampal  
1001 Synapse Stability and Plasticity in Abl2/Arg-Deficient Mice. *Journal of Neuroscience*  
1002 36:6778-6791.
- 1003 Yashiro K, Philpot BD (2008) Regulation of NMDA receptor subunit expression and its  
1004 implications for LTD, LTP, and metaplasticity. *Neuropharmacology* 55:1081-1094.
- 1005 Yeung LC, Castellani GC, Shouval HZ (2004) Analysis of the intraspinal calcium dynamics and  
1006 its implications for the plasticity of spiking neurons. *Phys Rev E Stat Nonlin Soft Matter*  
1007 *Phys* 69:011907.
- 1008 Zeng S, Holmes WR (2010) The effect of noise on CaMKII activation in a dendritic spine during  
1009 LTP induction. *J Neurophysiol* 103:1798-1808.
- 1010 Zhao JP, Constantine-Paton M (2007) NR2A / Mice Lack Long-Term Potentiation But Retain  
1011 NMDA Receptor and L-Type Ca<sup>2+</sup> Channel-Dependent Long-Term Depression in the  
1012 Juvenile Superior Colliculus. *Journal of Neuroscience* 27:13649-13654.
- 1013

1014 **Figure legends**

1015

1016 *Figure 1: mSCaTs measured by GCaMP6f imaging reflect NMDAR activation at individual*  
1017 *synapses following spontaneous single vesicle release.*

1018 A. Cultured hippocampal neuron infected with AAV-GCaMP6f. Left panel: GCaMP6f  
1019 average (green), middle panel:  $\Delta F$  calculated by subtracting GCaMP6f average from  
1020 GCaMP6f maximum projection (magenta), right panel: merge of GCaMP6f average  
1021 (green) and  $\Delta F$  (magenta). Bottom panels: Zoom in of boxed spine from cell in top left.  
1022 First panel is GCaMP6f average, the 2<sup>nd</sup> through 4<sup>th</sup> panels are individual frames  
1023 showing a single mSCaT at 0 msec, 400 msec, and 800 msec respectively. Red circles  
1024 indicate ROIs for data traces shown in B.

1025 B.  $\Delta F/F$  traces from spine and dendrite regions circled in red in A.

1026 C. Frequency histogram of mSCaT amplitude for individual synapses across 923 spines  
1027 from 8 cells.

1028 D. Frequency histogram of mSCaT frequency for individual synapses across 923 spines  
1029 from 8 cells.

1030 E. Representative GCaMP6f traces demonstrating that treatment with ryanodine,  
1031 thapsigargin, DNQX, and nifedipine (Blockers) did not alter mSCaT amplitude compared  
1032 to vehicle treatment.

1033 F. Quantification of effect of blockers on mSCaT amplitude compared to vehicle treatment  
1034 revealed that blockade of non-NMDAR sources of  $Ca^{2+}$  did not impact mSCaT  
1035 amplitude.

1036 G. Representative GCaMP6f traces demonstrating that treatment with APV eliminated  
1037 mSCaTs compared to vehicle treatment.

1038 H. Treatment with APV eliminates 94% of events.

1039 I. Raising extracellular  $\text{Ca}^{2+}$  causes increased mSCaT amplitude, while application of 30  
1040  $\mu\text{M}$ , 100  $\mu\text{M}$ , and 1 mM  $\text{Mg}^{2+}$  reduce mSCaT amplitude. For example mSCaT traces  
1041 see Extended Data Figure 1-1.

1042

1043 *Figure 2: GluN2B-NMDARs mediate majority of response to spontaneous glutamate release.*

1044 A. Average projection of GCaMP6f (green) at baseline and following treatment with active  
1045 synapse shown in magenta. Following treatment with ifenprodil there is a clear reduction  
1046 in the number of active spines compared to baseline (scale bar: 10  $\mu\text{m}$ ).

1047 B. Example traces from spines treated with either vehicle (black) or ifenprodil (red).

1048 C. Ifenprodil treatment leads to a reduction in mSCaT amplitude at both 3 and 5 weeks.  
1049 Outliers removed for data display. Solid line represents median and dashed lines  
1050 indicate 1<sup>st</sup> and 3<sup>rd</sup> quartile.

1051 D. Cumulative probability for amplitude normalized to baseline for ifenprodil and vehicle  
1052 treated cells at 3 and 5 weeks.

1053 E. Ifenprodil treatment leads to a reduction in mSCaT frequency at both 3 and 5 weeks.  
1054 Outliers removed for data display. Solid line represents median and dashed lines  
1055 indicate 1<sup>st</sup> and 3<sup>rd</sup> quartile. See also Extended Data Figure 2-1 and 2-2.

1056 F. Cumulative probability for frequency normalized to baseline for ifenprodil and vehicle  
1057 treated cells at 3 and 5 weeks. Treatment with ifenprodil reduces mSCaT frequency with  
1058 a portion of spines completely blocked.

1059 G. Post-treatment mSCaT amplitude versus baseline mSCaT amplitude has a slope of  
1060  $0.6167 \pm 0.033$  for vehicle treated cells and  $0.327 \pm 0.025$  for ifenprodil treated cells and  
1061 these slopes are significantly different ( $p < 0.0001$ ). Post-treatment mSCaT amplitude is  
1062 correlated with baseline amplitude for both vehicle treated synapses ( $R^2 = 0.42$ ,  
1063  $p < 0.0001$ ) and ifenprodil treated synapses ( $R^2 = 0.22$ ,  $p < 0.0001$ ). See also Extended  
1064 Data Figure 2-1 and 2-2.

- 1065 H. Baseline mSCaT frequency versus post treatment mSCaT frequency reveals that nearly  
1066 all synapses show a reduction in event number with ifenprodil treatment (vehicle: slope=  
1067  $0.7984 \pm 0.02368$ ; ifenprodil: slope=  $0.108 \pm 0.005452$ ;  $p < 0.0001$ ). Post-treatment  
1068 mSCaT amplitude is correlated with baseline amplitude for both vehicle treated  
1069 synapses ( $R^2=0.56$ ,  $p < 0.0001$ ) and ifenprodil treated synapses ( $R^2=0.31$ ,  $p < 0.0001$ ).
- 1070 I. Normalized amplitude post ifenprodil treatment is negatively correlated with baseline  
1071 amplitude.
- 1072 J. Normalized mSCaT frequency post ifenprodil treatment is negatively correlated with  
1073 baseline mSCaT frequency.
- 1074 K. Within spine CV decreases following ifenprodil treatment.

1075

1076 *Figure 3: NMDAR activation is independent of spine area.*

- 1077 A. Example stretch of dendrite from post- $\text{Ca}^{2+}$  imaging GCaMP6f z-stack (scale bar 10  
1078  $\mu\text{m}$ ).
- 1079 B. Zoom in of spines indicated by white arrowheads from A paired with their respective  
1080  $\text{Ca}^{2+}$  traces (scale bar 1  $\mu\text{m}$ ).
- 1081 C. mSCaT amplitude weakly, negatively correlates with spine area. First plot is all  
1082 spines, second plot binned data.
- 1083 D. Effect of ifenprodil on amplitude (light red) and frequency (dark red) does not  
1084 correlate with spine area. Left plot is all spines, right plot is binned data.
- 1085 E. GCaMP6f max projection acquired directly following  $\text{Ca}^{2+}$  imaging (scale bar is 20  
1086  $\mu\text{m}$ ) of dSTORM imaged neuron. White box indicates area where super-resolution  
1087 imaging was performed.
- 1088 F. Zoom in on the region from E. Max projection of GCaMP6f stack acquired at time of  
1089 STORM imaging (white) (scale bar is 5  $\mu\text{m}$ ). Super-resolved shank localizations are

1090 shown in red. Right is a zoom-in of the shank localizations from the spine indicated  
1091 with the yellow arrowhead.

1092 G. Zoom in on a mSCaT in the spine indicated by yellow arrowhead in F.

1093 H.  $\text{Ca}^{2+}$  trace from spine indicated by yellow arrowhead in F.

1094 I. Amplitude does not correlate with PSD area.

1095

1096 *Figure 4: Mapping synapse position and mSCaT characteristics with Imaris.*

1097 A.  $\text{Ca}^{2+}$  imaged spines along traced dendrite from Imaris. Scale bar is 30  $\mu\text{m}$ . First panel  
1098 shows distance from soma, second panel shows branch depth, and third panel shows  
1099 mSCaT amplitude. Colors are warmer as spines that are farther from the cell body, have  
1100 higher branch depth, or have larger mSCaT mean amplitudes respectively. Further  
1101 details on tracing and spine identification can be seen in Extended Data Figure 4-1.

1102 B. Zoom-in of boxed areas from A.

1103 C. mSCaT amplitude did correlate with distance from soma for proximal spines.

1104 D. mSCaT amplitude did correlate with distance from soma when distal spines are  
1105 included.

1106 E. Binned data from D demonstrating relationship between spine distance from the soma  
1107 and mSCaT amplitude

1108 F. Magnitude of ifenprodil effect on mSCaT amplitude (light red) and frequency (dark red)  
1109 does not correlate with distance from the soma.

1110 G. mSCaT amplitude did not correlate with the number of branch points away from the  
1111 soma the synapse is (branch depth) for proximal spines.

1112 H. mSCaT amplitude does correlate with branch depth when distal spines are included.

1113 I. Mean mSCaT amplitude at each branch depth.

1114 J. Magnitude of ifenprodil effect on mSCaT amplitude (light red) and frequency (dark red)  
1115 did not correlate with branch depth.

1116

1117 **Extended Data**

1118 *Figure 1-1: Example mSCaT traces from cells in Figure 1*

1119 Example mSCaT traces for data from Figure 1I.

1120 *Figure 2-1: Chronic expression of GCaMP6f does not alter GluN2B-NMDAR contribution to*  
1121 *mSCaTs or GluN2B developmental shift.*

1122 A. Ifenprodil has the same effect on mSCaT amplitude for transiently transfected cells as  
1123 infected cells (Normalized amplitude: Veh-infected:  $0.98 \pm 0.016$ , n=1196/20; Ifen-  
1124 Infected:  $0.622 \pm 0.017$ , n=565/10; Veh-transfected:  $1.07 \pm 0.035$ , n=103/4; Ifen-  
1125 transfected:  $0.633 \pm 0.051$ , n=81/4; p<0.0001, one-way ANOVA).

1126 B. Ifenprodil has the same effect on mSCaT frequency for transiently transfected cells as  
1127 infected cells (Normalized frequency: Veh-infected:  $0.82 \pm 0.022$ , n=961/20; Ifen-  
1128 Infected:  $0.137 \pm 0.006$ , n=788/10; Veh-transfected:  $0.855 \pm 0.063$ , n=110/4; Ifen-  
1129 transfected:  $0.20 \pm 0.048$ , n=142/4; p<0.0001, one-way ANOVA).

1130 C. Hippocampal neurons were infected with AAV-GFP or AAV-GCaMP6f on DIV0 and  
1131 harvested on DIV12 or DIV19. Representative immunoblots for GluN1, GluN2A, GluN2B,  
1132 and  $\alpha$ -Tubulin are shown. Molecular weight markers (kD) indicated for each immunoblot.  
1133 Sample from adult rat hippocampus (HC) included as positive control.

1134 D. Quantitation shows decrease in GluN2B/GluN2A ratio from DIV12 to DIV19. Graph  
1135 depicts normalized mean GluN2B/GluN2A ratios  $\pm$  SEM (DIV factor: p<0.0001; Infection  
1136 factor p=0.5009; Interaction: p=0.812; two-way ANOVA).

1137

1138 *Figure 2-2: Representative full immunoblots from Figure 2-1*

1139 A.-D. Representative full immunoblots from Figure 2-1.

1140 E. Full blot of REVERT protein stain.

1141



1142 *Figure 4-1: Imaris tracing examples*

1143 A. Max projection of GCaMP6f stack taken following GCaMP6f imaging. Zoom in of white  
1144 box is on the right. Scale bars are 30  $\mu\text{m}$ .

1145 B. Semi-automatic spine detection on max projection of GCaMP6f. Blue spines are spines  
1146 that do not have  $\text{Ca}^{2+}$  imaging data while spines in red do. Zoom in of white box is on the  
1147 right. Scale bars are 30  $\mu\text{m}$ .

1148 C. Semi-automatic dendrite and spine detection in Imaris detects dimensions of cell  
1149 features based on fluorescence.

1150

1151

1152

Figure 1

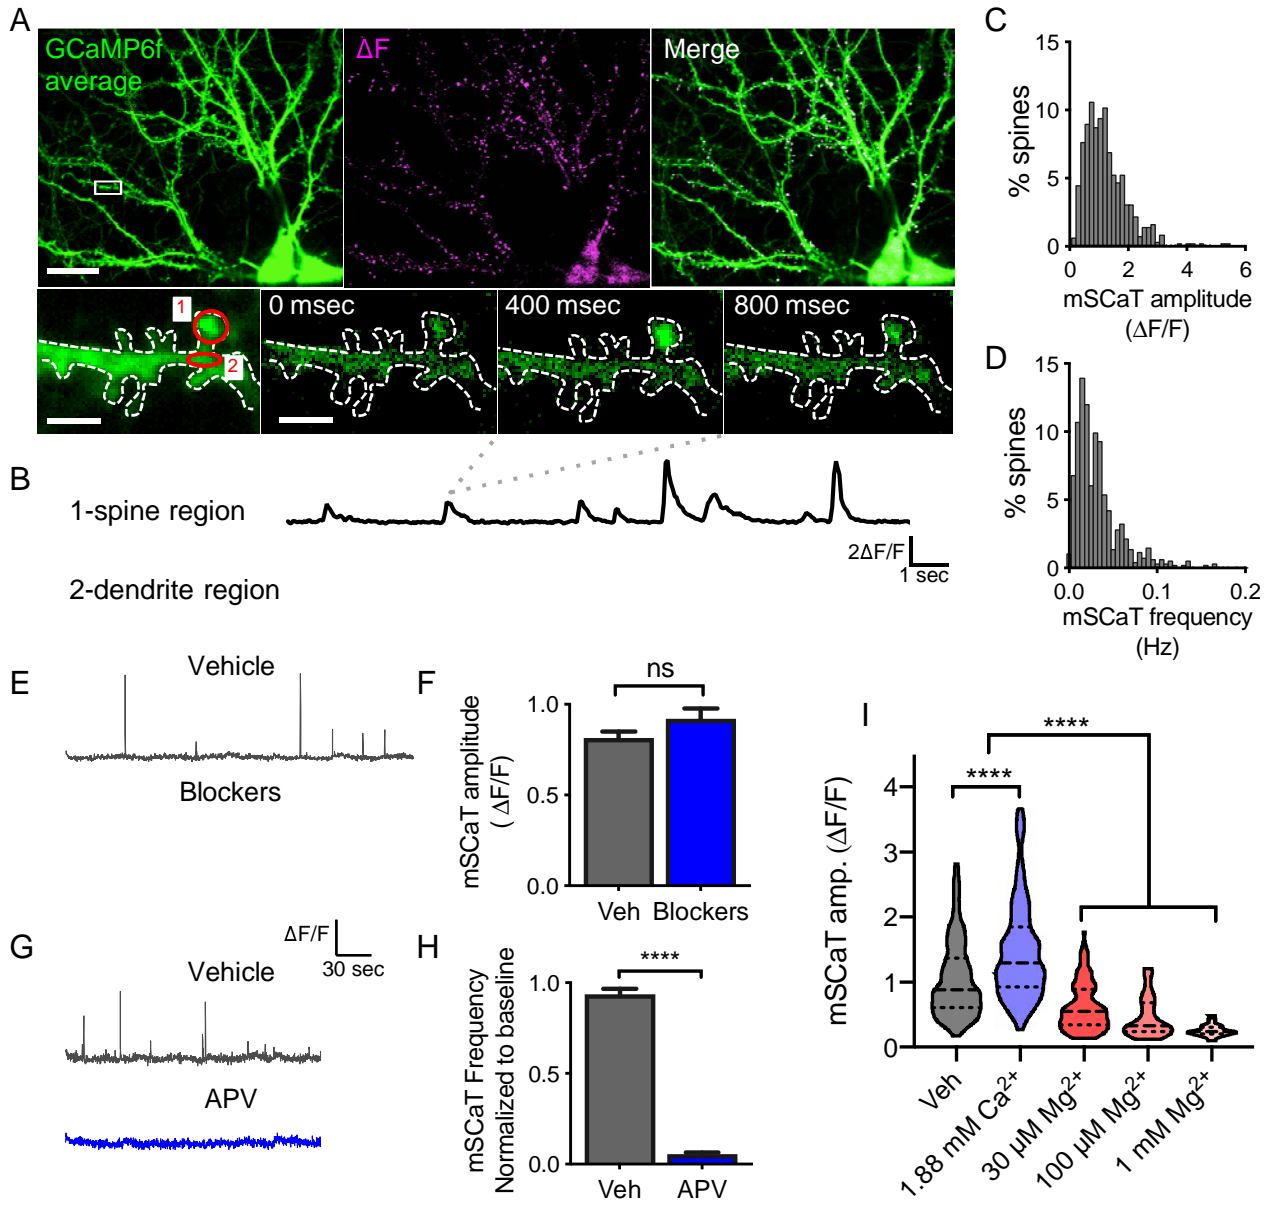

Figure 2

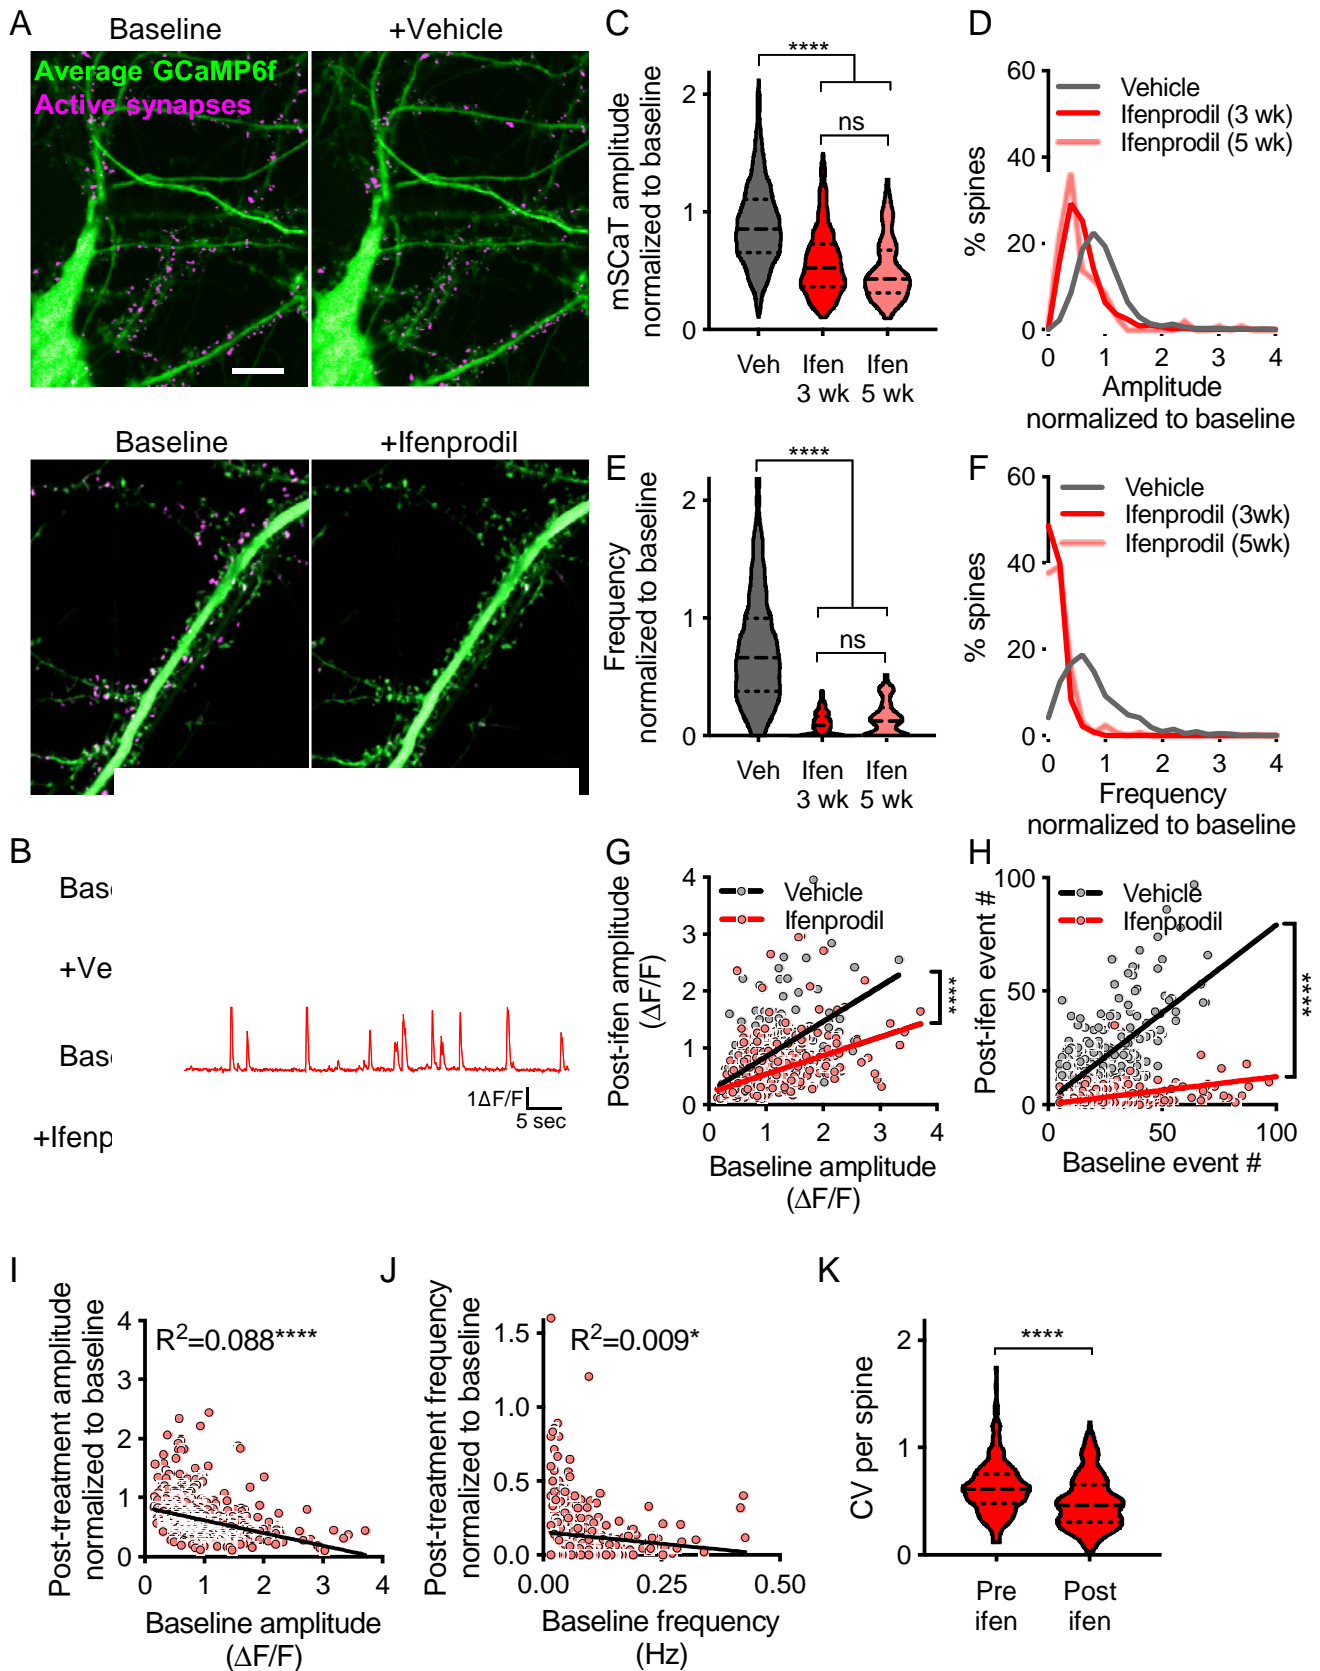

Figure 3

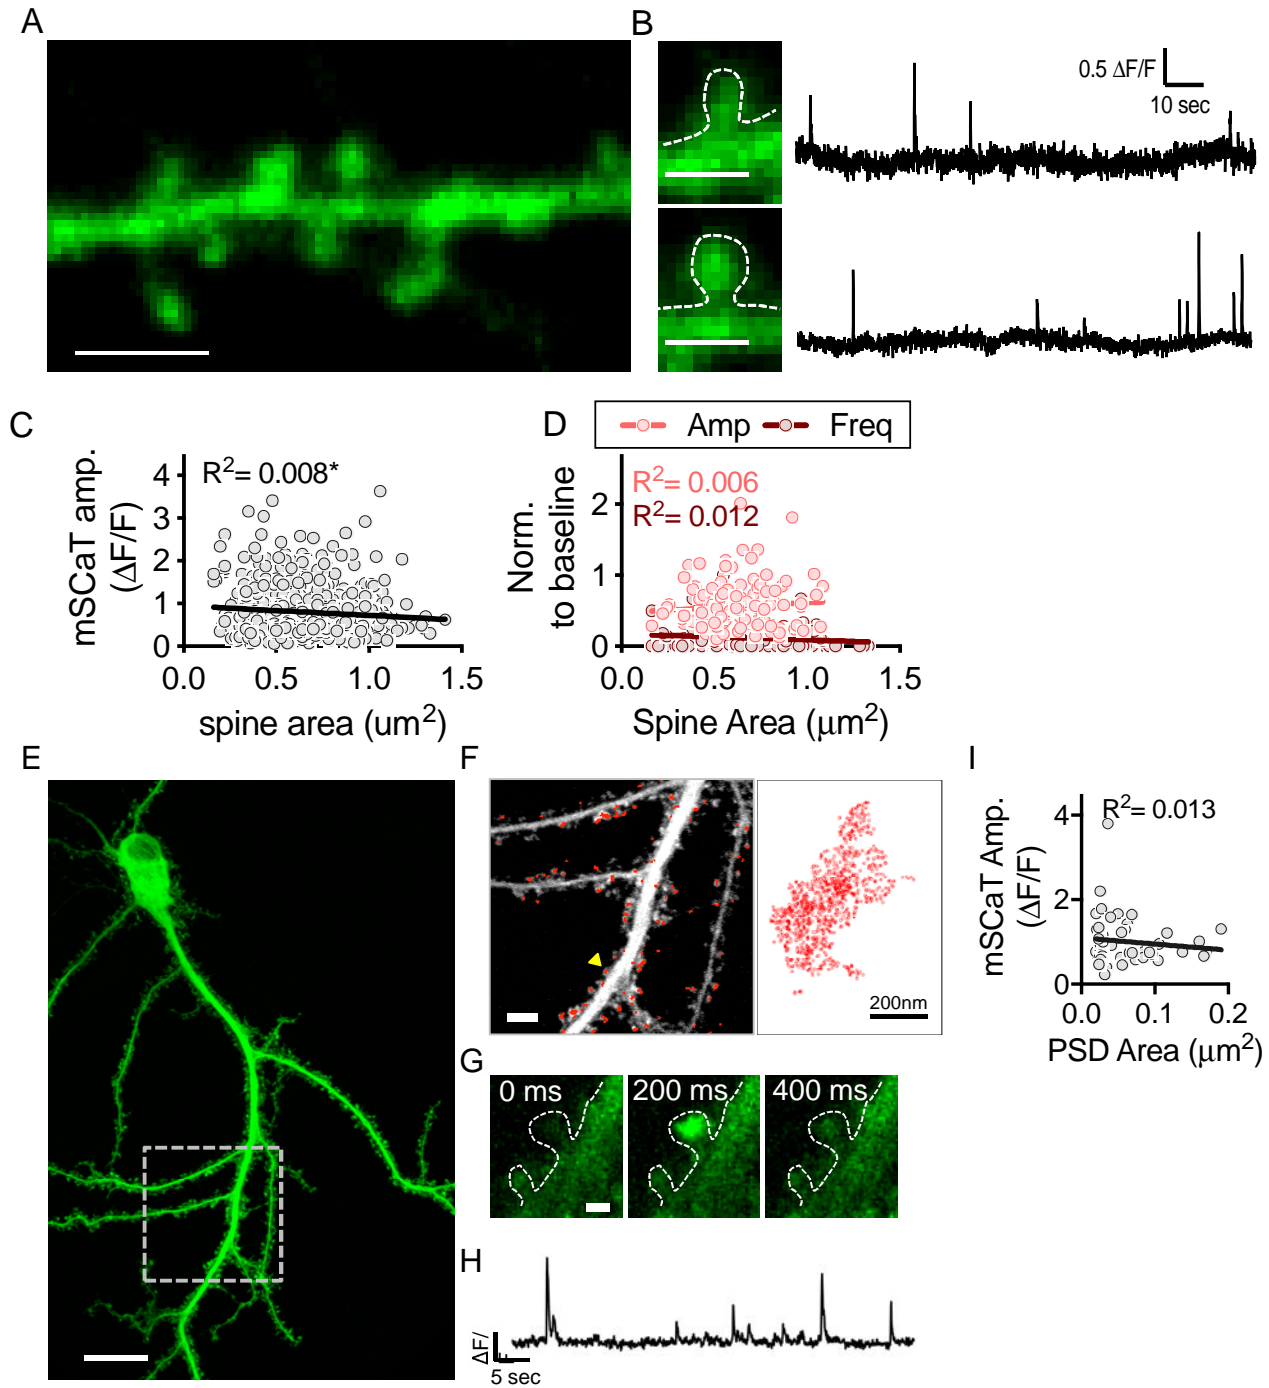

Figure 4

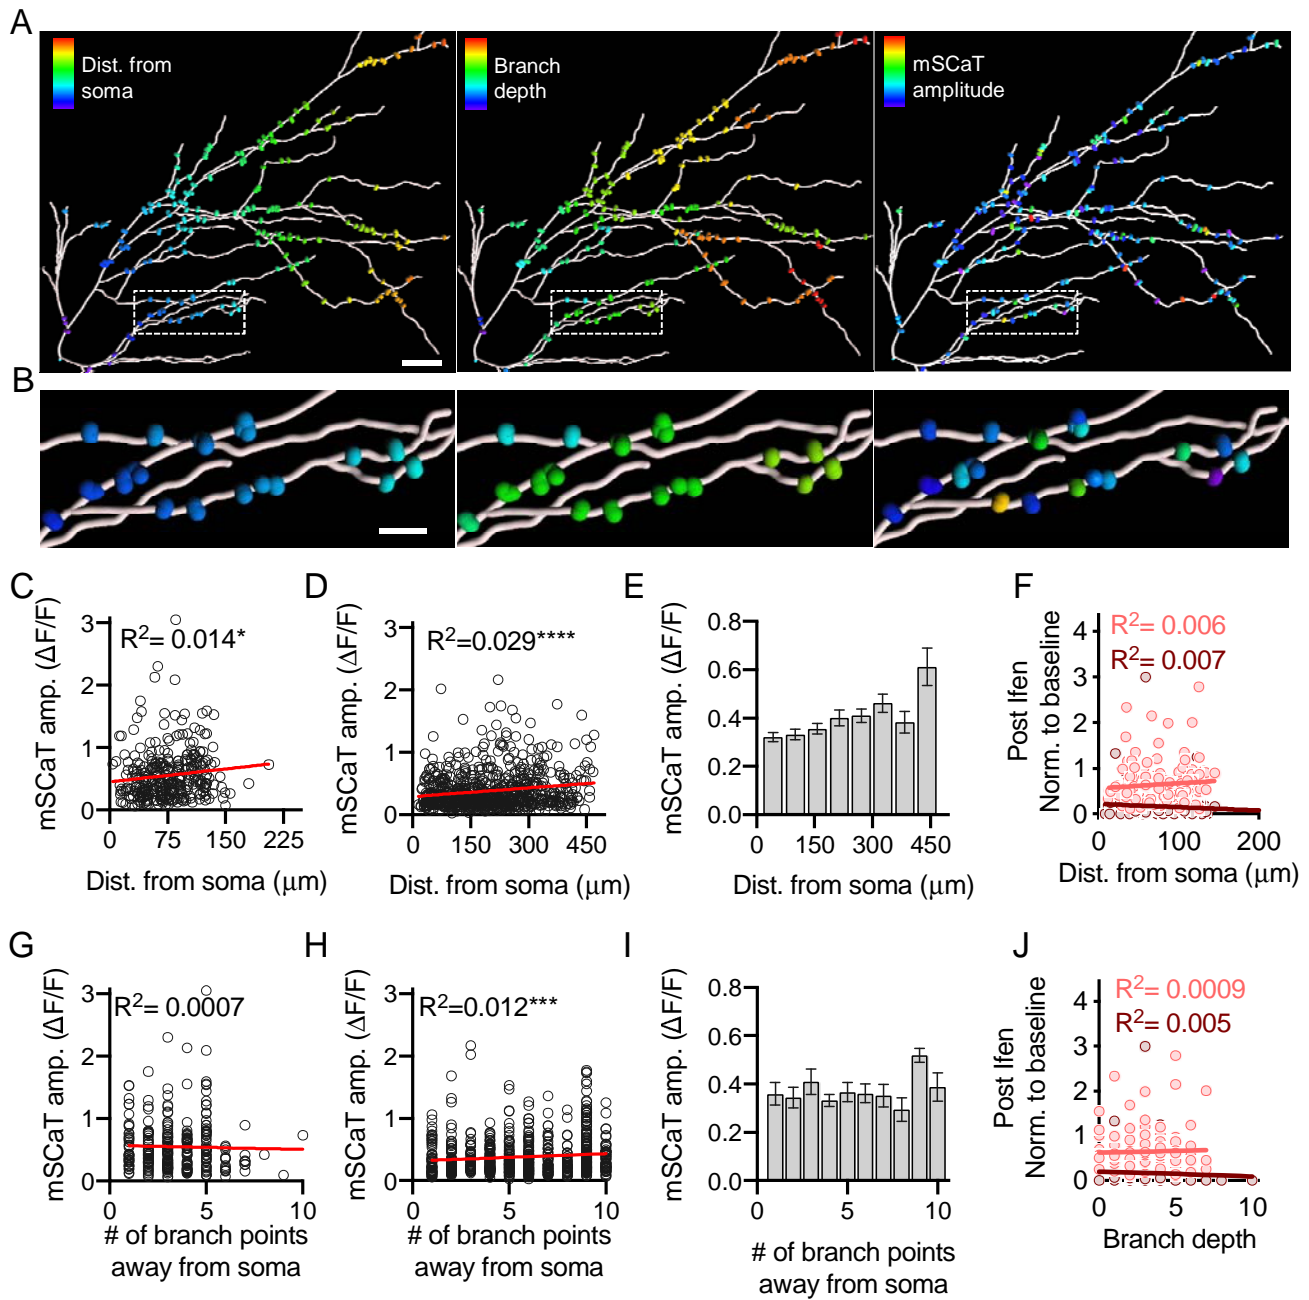

## Extended Data Figure 1-1

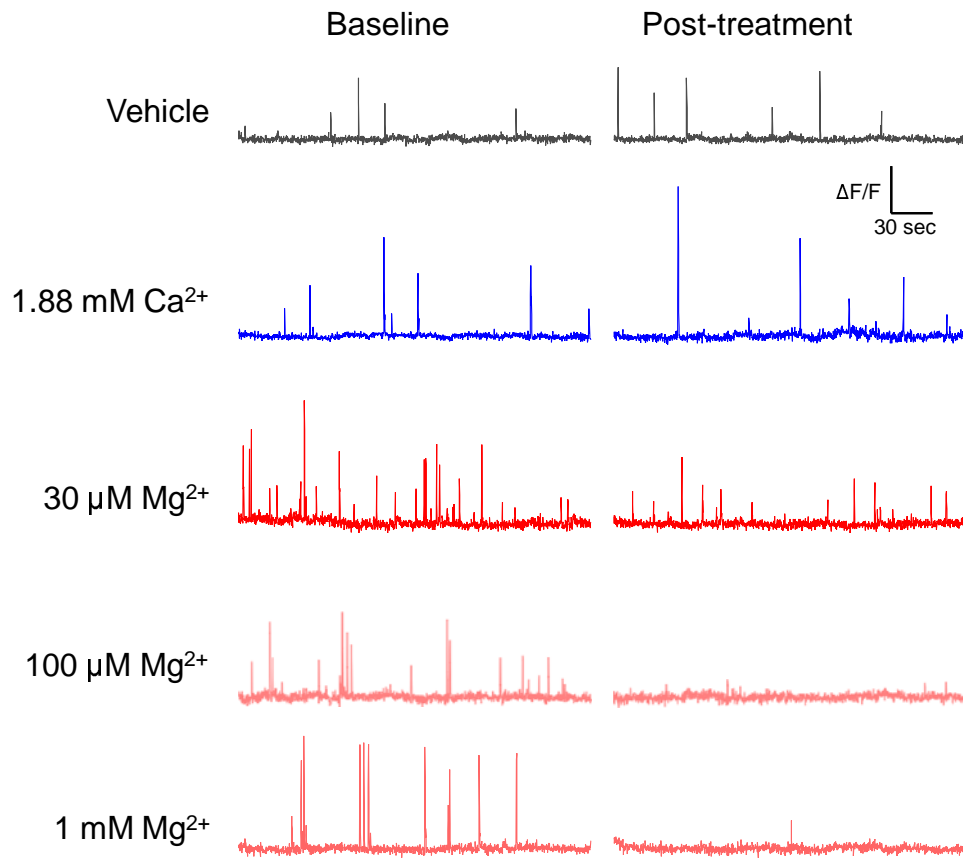

## Extended Data Figure 2-1

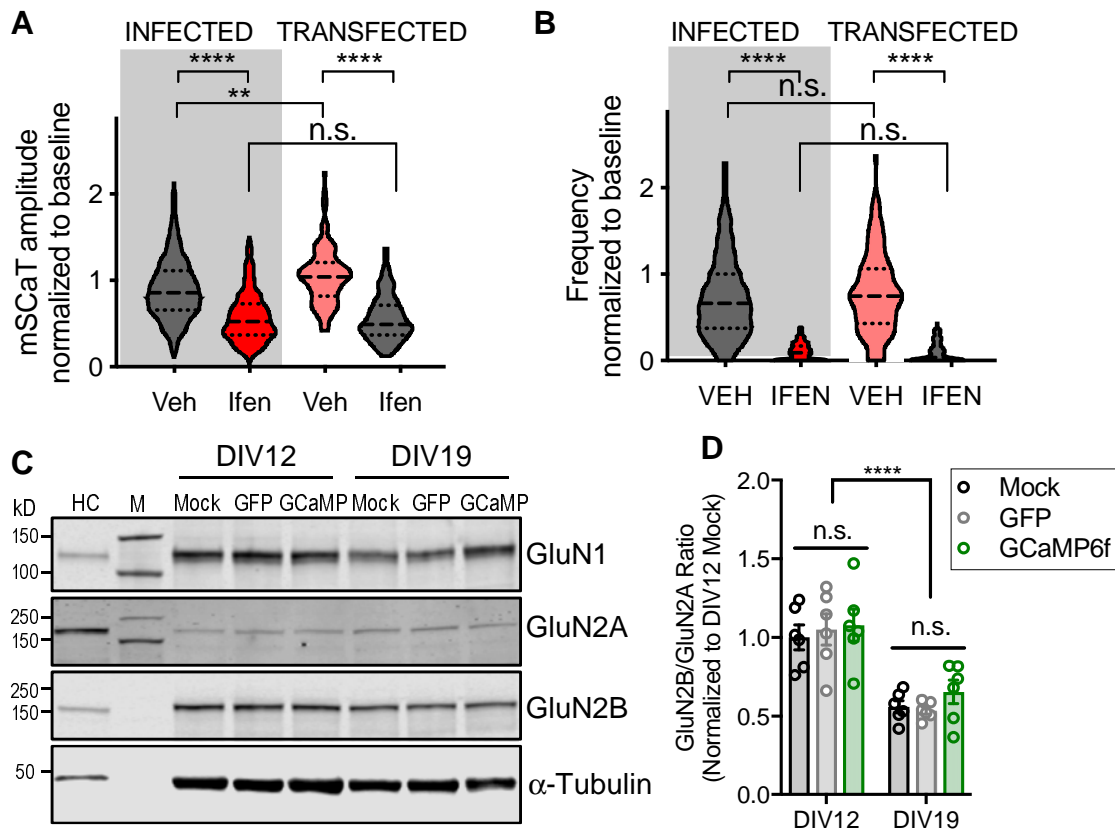

## Extended Data Figure 2-2

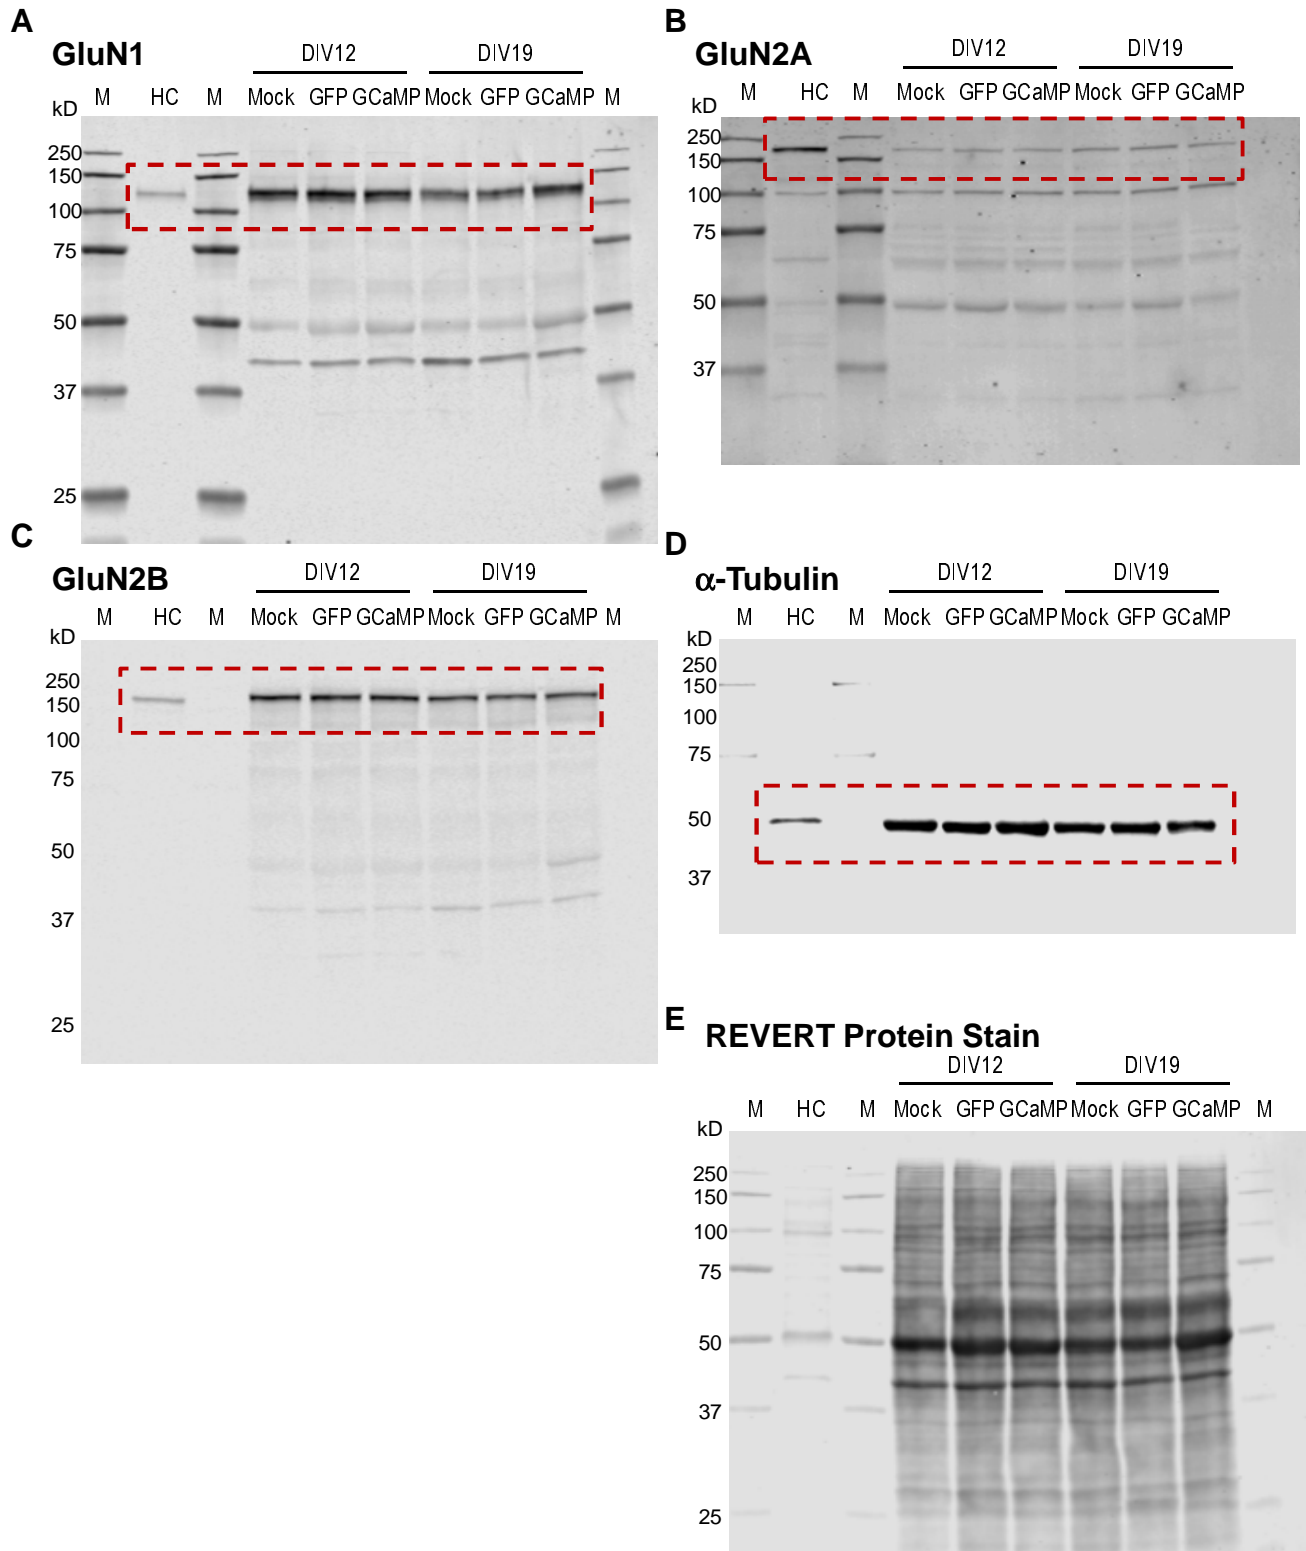



Extended Data Figure 4-1

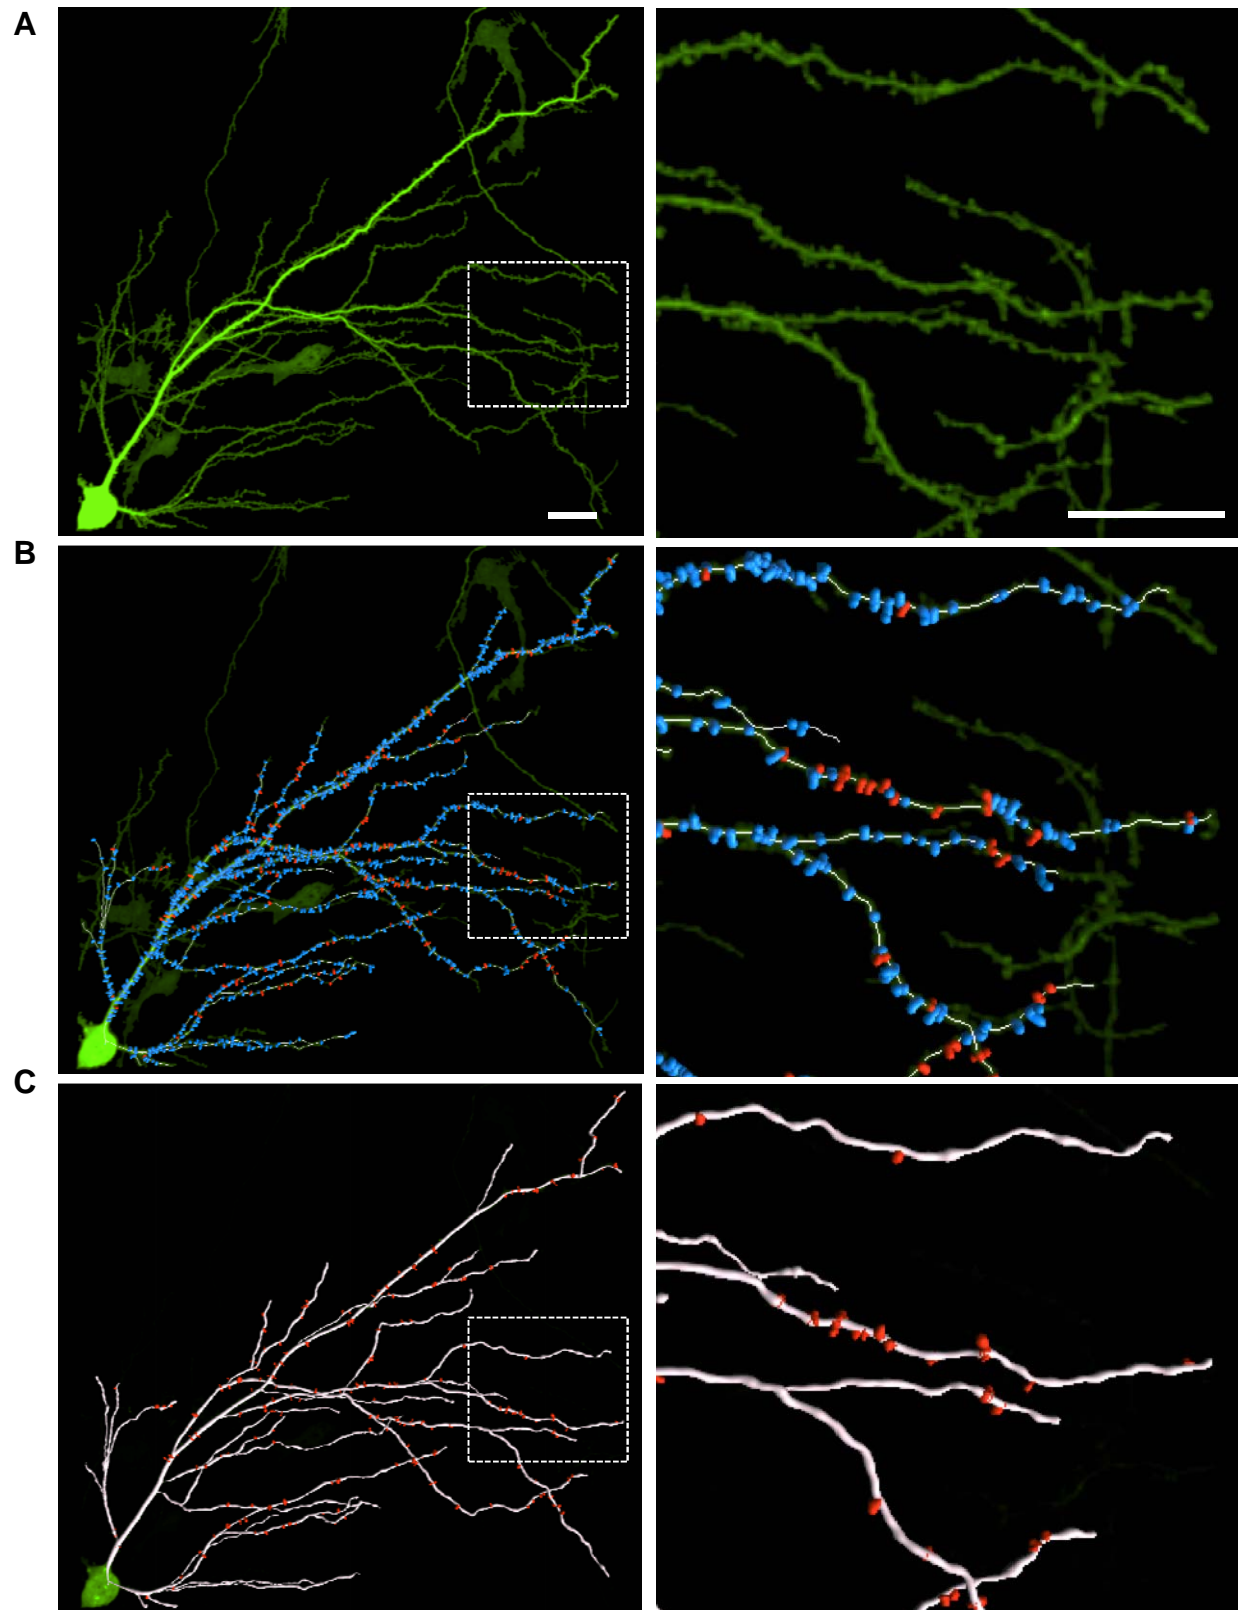

Source: http://biorxiv.org/content/10.1101/590141v1.full.pdf
